# Supplementary material
Source: publisher figshare collection journal article supplement (https://acs.figshare.com/ndownloader/files/12175370)
Supplement: Supplementary file 1 [file 12175370]

94
1.
 C                  2.43561200   -2.29231200    2.25400800
 C                  1.89448200   -1.29729400    3.11016600
 C                  0.51583000   -1.12154300    2.77604200
 C                  0.18814800   -2.02470900    1.71225400
 C                  1.39907000   -2.71444700    1.36604900
 C                  3.79824800   -2.91155700    2.37792800
 H                  4.52822900   -2.21023100    2.79521900
 H                  4.18512500   -3.25982200    1.41567500
 H                  3.76393400   -3.78138900    3.04882100
 C                  2.59612800   -0.66062300    4.27689600
 H                  2.57310000   -1.32453100    5.15274200
 H                  2.12081200    0.27894900    4.57237700
 H                  3.64849700   -0.44584800    4.06174700
 C                 -0.44112100   -0.25936700    3.55444000
 H                 -0.40760700   -0.52010600    4.62019400
 H                 -1.47211400   -0.39705200    3.22088300
 H                 -0.21230600    0.80936000    3.47564600
 C                 -1.12162000   -2.20244900    1.02478300
 H                 -1.96367100   -1.93482400    1.67458400
 H                 -1.26188800   -3.23470800    0.70043500
 C                  1.51015700   -3.82729700    0.36143200
 H                  2.53175400   -3.93736100   -0.01566900
 H                  0.85577300   -3.66793200   -0.49893400
 H                  1.22592100   -4.78810100    0.81425800
 C                 -2.13042800   -2.52370100   -1.93121100
 C                 -1.02613700   -1.92833300   -2.61681700
 C                 -1.36293500   -0.57375400   -2.89936600
 C                 -2.68421300   -0.33434500   -2.40828700
 C                 -3.15156500   -1.53623700   -1.80279300
 C                 -2.27872700   -3.97664800   -1.57584000
 H                 -2.74044700   -4.53033900   -2.40518700
 H                 -2.91705000   -4.11996700   -0.69828600
 H                 -1.31654100   -4.45352600   -1.36512100
 C                  0.23529700   -2.61271400   -3.07052300
 H                  0.29092900   -2.62692500   -4.16714800
 H                  0.27609100   -3.65204300   -2.73318900
 H                  1.13492200   -2.10554000   -2.70545200
 C                 -0.50897200    0.40013400   -3.66393200
 H                 -0.66116900    0.28581000   -4.74672100
 H                  0.55420600    0.25240900   -3.45611300
 H                 -0.74774200    1.43683500   -3.40789300
 C                 -3.49157200    0.90337900   -2.67240200
 H                 -2.87548000    1.80798300   -2.64877500
 H                 -4.29769000    1.03253900   -1.94807500
 H                 -3.94634500    0.84727000   -3.67171300
 C                 -4.51891500   -1.76265800   -1.21989400
 H                 -4.95205700   -0.84154500   -0.82355200
 H                 -4.49701500   -2.49166000   -0.40310600
 H                 -5.20574100   -2.15378700   -1.98423800
 C                  2.13420400    1.48301600    1.66362400
 H                  2.12527500    1.50862100    2.75520400
 H                  3.18808000    1.50363800    1.33616200
 C                  1.37849200    2.63701300    1.09236700
 C                  1.58324800    3.08036900   -0.23028600
 H                  2.31612400    2.57646000   -0.85380700
 C                  0.86429600    4.15556400   -0.74972100
 H                  1.05247000    4.47892000   -1.77101500
 C                 -0.08157400    4.82561800    0.03303500
 H                 -0.63453200    5.66927200   -0.37182600
 C                 -0.29318100    4.40575400    1.34765700
 H                 -1.01601200    4.92055100    1.97605300
 C                  0.42813500    3.32982600    1.86657500
 H                  0.26592900    3.03004600    2.90007700
 C                  3.64119800   -0.87951800   -0.16360700
 H                  4.40652200   -1.04840200    0.60099300
 H                  3.46634100   -1.82897200   -0.68650200
 C                  4.06395800    0.19544300   -1.10779300
 C                  3.55383300    0.27596400   -2.41822300
 H                  2.83768100   -0.47139200   -2.75016900
 C                  3.94997200    1.28654000   -3.29323100
 H                  3.54073700    1.31581900   -4.30041800
 C                  4.87000000    2.25595400   -2.88453500
 H                  5.17876600    3.04426300   -3.56559500
 C                  5.39358800    2.19208500   -1.59106300
 H                  6.11845500    2.93162800   -1.25961600
 C                  4.99745800    1.17734800   -0.72026600
 H                  5.42596800    1.13378600    0.27951800
 C                 -2.05225000    0.92222100    0.40010700
 H                 -1.39039500    0.84752400    1.27877100
 H                 -1.67025200    1.77419500   -0.17873200
 C                 -3.46063000    1.14616100    0.83401700
 C                 -4.11192000    0.28121100    1.73657900
 H                 -3.58444400   -0.59096600    2.11398300
 C                 -5.42106000    0.51271100    2.15794400
 H                 -5.88889700   -0.17594700    2.85772100
 C                 -6.13061600    1.61939900    1.68576700
 H                 -7.15126500    1.80015500    2.01185200
 C                 -5.50363700    2.49622700    0.79805800
 H                 -6.03392100    3.37223700    0.43199500
 C                 -4.19036200    2.26550900    0.38659400
 H                 -3.70680100    2.97294200   -0.28236400
 O                  0.58891700   -0.19116700   -0.56869100
 Ti                 1.76294000   -0.43843300    0.80297400
 Ti                -1.15344500   -0.74141300   -0.55867200

100
TS1A1
 C                 -1.59796300    1.14813400   -0.46051900
 C                 -2.89331800    1.77768000   -0.81782200
 C                 -3.82917700    2.12352000    0.18017200
 C                 -3.22360400    2.11552100   -2.14597600
 C                 -5.02977900    2.75983200   -0.13493700
 C                 -5.34418600    3.06930500   -1.46267100
 C                 -4.42874000    2.74238000   -2.46557900
 H                 -0.79474900    1.51989600   -1.10964600
 H                 -1.32979600    1.43137800    0.56962100
 H                 -3.59781500    1.89637400    1.21834900
 H                 -2.51066500    1.90246200   -2.93883400
 H                 -5.71499400    3.03531700    0.66465400
 H                 -6.27398400    3.57634700   -1.70757700
 H                 -4.64396400    2.99331800   -3.50184300
 C                 -1.44232300   -1.87345100    1.69681900
 C                 -1.86130300   -0.87072800    2.72069700
 C                 -0.95230100    0.06003300    3.26753200
 C                 -3.19128700   -0.81387700    3.18552700
 C                 -3.59326900    0.11984500    4.14036700
 C                 -2.67638600    1.03396400    4.66567500
 C                 -1.35180900    0.99382100    4.22314600
 H                 -0.49246200   -2.34995800    1.96806600
 H                 -2.20266000   -2.64488900    1.55942000
 H                  0.07518500    0.05351000    2.91680300
 H                 -3.91236700   -1.52838400    2.79787500
 H                 -4.62561000    0.12730000    4.48351500
 H                 -2.98722200    1.76045500    5.41183200
 H                 -0.62346500    1.69472300    4.62494800
 C                 -0.27066500   -3.00122000   -1.04851300
 C                  0.43276700   -2.01689500   -1.81697200
 C                 -1.66189900   -2.89970200   -1.34372100
 C                 -1.83728100   -1.81747000   -2.25240100
 C                 -0.55185100   -1.26291900   -2.53543300
 C                  0.37587400   -4.06255800   -0.20484200
 C                 -3.10749900   -1.44188800   -2.96261700
 C                 -0.28325400   -0.22534300   -3.59287300
 C                  1.91141100   -1.84071300   -1.82855400
 Ti                -0.91494700   -0.88035700   -0.14092700
 O                  0.71522800   -0.28596300    0.50836400
 C                  4.58592300    0.26092200    0.41950900
 C                  4.78076600   -0.95177600   -0.29837900
 C                  3.76614600   -0.02877900    1.55624700
 C                  3.48236600   -1.42743300    1.55133700
 C                  4.11729300   -1.99761600    0.40536700
 C                  5.29401300    1.55784800    0.15629400
 C                  3.38149900    0.95137000    2.63178300
 C                  4.24028900   -3.46199800    0.09146700
 C                  5.60107400   -1.11476000   -1.54811200
 Ti                 2.34267900   -0.42226700   -0.28112100
 C                 -2.71759400   -3.87699700   -0.91142800
 C                  2.75834200   -2.17737800    2.63718800
 H                  0.77762500   -4.87116400   -0.83224800
 H                 -0.33182600   -4.51233900    0.49706600
 H                  1.20817100   -3.66129600    0.37944600
 H                 -3.94947500   -2.04641900   -2.61682700
 H                 -3.00299700   -1.61443500   -4.04350400
 H                 -3.37345200   -0.39006900   -2.82205900
 H                 -0.91386100   -0.40803700   -4.47176600
 H                  0.75868900   -0.26357300   -3.92577500
 H                 -0.48330400    0.80032000   -3.26496900
 H                  2.25940400   -1.33609600   -2.74023400
 H                  2.42665200   -2.79990800   -1.75243600
 H                  5.41778900    1.75438400   -0.91288000
 H                  6.29889300    1.52995600    0.60179500
 H                  4.76524300    2.41158900    0.58427100
 H                  3.13713400    1.93594500    2.22077400
 H                  4.20676600    1.08666900    3.34522800
 H                  2.51367400    0.60472100    3.20015900
 H                  4.36443000   -3.64362100   -0.98061600
 H                  3.37576400   -4.03938500    0.42951500
 H                  5.12417500   -3.88194000    0.59197600
 H                  6.63331000   -1.40946300   -1.31143200
 H                  5.65554100   -0.18200700   -2.11865900
 H                  5.18943600   -1.88453300   -2.21003200
 H                 -3.69286800   -3.39886700   -0.79569600
 H                 -2.46914000   -4.34905300    0.04379800
 H                 -2.82328300   -4.68205400   -1.65257700
 H                  1.89575000   -1.62125300    3.01579100
 H                  3.42674300   -2.36776500    3.48855100
 H                  2.39552600   -3.14918000    2.29008900
 C                  2.40814100    1.34262500   -1.47363000
 C                  2.40381600    2.73966200   -0.93296200
 C                  3.24217900    3.73099800   -1.47578900
 C                  1.54780200    3.12323400    0.11792100
 C                  1.53192600    4.43339800    0.59833100
 C                  2.37749000    5.40055700    0.04916000
 C                  3.23412800    5.04027100   -0.99262000
 H                  1.44685000    1.13583300   -1.97229700
 H                  3.19108200    1.22165400   -2.23525300
 H                  3.90568300    3.46950100   -2.29759600
 H                  0.88914500    2.38146600    0.55950200
 H                  0.85471800    4.69801400    1.40693200
 H                  2.36510700    6.42032900    0.42461500
 H                  3.89447900    5.78118900   -1.43726200
 C                 -4.11139300   -1.02439200    0.06745700
 N                 -5.27606000   -0.89762500    0.01950400
 C                 -6.65934000   -0.58145000   -0.04872300
 H                 -7.15918100   -0.89317000    0.87321900
 H                 -7.11880800   -1.09791300   -0.89668300
 H                 -6.76668100    0.49944600   -0.17902600

100
TS1B1
 C                 -4.01023800   -1.93077200    1.03799000
 N                 -4.77951100   -2.45454300    1.74884500
 C                 -5.70477100   -3.08607400    2.62555400
 C                  1.51210100   -2.55872100    1.03996200
 C                  0.21573400   -2.10655300    1.46051700
 C                  2.49682900   -1.97848200    1.89744200
 C                  1.82593700   -1.15116500    2.83554300
 C                  0.42318500   -1.22820900    2.57008900
 C                  1.76603300   -3.63709800    0.02571400
 C                  2.44229600   -0.46620200    4.02106300
 C                 -0.63850400   -0.58880100    3.42546900
 C                 -1.09749200   -2.39865100    0.81914700
 Ti                 1.30460500   -0.20490200    0.63042600
 C                  2.03470500    1.59991700    1.54643700
 C                  2.48883600   -0.43878800   -1.12929500
 C                  3.91947600   -0.83183000   -1.23584900
 C                  4.31049700   -2.02694300   -1.87163300
 C                  4.94562000   -0.01250300   -0.72366800
 C                  6.28576400   -0.38534300   -0.81326700
 C                  6.65000700   -1.59040600   -1.42068300
 C                  5.65131800   -2.40591200   -1.95636900
 C                  2.41303800    2.69297500    0.59495400
 C                  1.51056400    3.22190200   -0.35007300
 C                  3.71296500    3.23646800    0.61516000
 C                  1.89048400    4.24155200   -1.22354000
 C                  3.18668700    4.76140600   -1.19001100
 C                  4.09687300    4.25108400   -0.26241100
 O                 -0.32287000    0.28041000   -0.07599900
 C                 -3.75587100   -0.69207900   -1.93435100
 C                 -3.08165400   -1.94866600   -1.98939800
 C                 -2.82800000    0.31760800   -2.32214900
 C                 -1.58738500   -0.31162000   -2.62833500
 C                 -1.74229900   -1.71213700   -2.41757600
 C                 -5.21959500   -0.47597100   -1.67081900
 C                 -3.10485100    1.77707600   -2.54287700
 C                 -0.75565500   -2.78351000   -2.78433000
 C                 -3.68864800   -3.31090500   -1.79661400
 Ti                -1.91600400   -0.60897000   -0.24882600
 C                 -3.08880500    0.81119300    0.90908600
 C                 -3.00271000    2.29823300    0.83459000
 C                 -4.13297600    3.06631800    0.49072300
 C                 -1.82354500    3.00179800    1.14183000
 C                 -1.76981200    4.39465400    1.09361900
 C                 -2.89956900    5.13478000    0.73559800
 C                 -4.08446100    4.45930500    0.43602800
 C                  3.96846100   -2.28458500    1.90390900
 C                 -0.40191300    0.40464000   -3.20739400
 H                  1.12027300   -3.54642800   -0.85063100
 H                  1.57022700   -4.62355100    0.47048500
 H                  2.80169800   -3.63195400   -0.31924100
 H                  3.50297700   -0.24959700    3.86101600
 H                  2.37330900   -1.10489200    4.91341200
 H                  1.94155400    0.47828600    4.25771600
 H                 -0.71098000    0.49853100    3.29713900
 H                 -0.43237900   -0.77159400    4.48770500
 H                 -1.62391200   -1.01062800    3.20820500
 H                 -1.82570600   -2.66062200    1.59298300
 H                 -1.02891100   -3.25700300    0.14312800
 H                  2.84358900    1.42545100    2.26102100
 H                  1.13940400    1.86941700    2.13108200
 H                  2.34890600    0.61479800   -1.42594000
 H                  1.86110800   -1.04824000   -1.79119700
 H                  3.54846400   -2.66009200   -2.32006000
 H                  4.68116800    0.93618100   -0.26545600
 H                  7.05236400    0.27281500   -0.41020200
 H                  7.69515300   -1.88008400   -1.48994800
 H                  5.91582000   -3.33552500   -2.45536600
 H                  0.50002400    2.82842200   -0.39660300
 H                  4.42781300    2.86346200    1.34638100
 H                  1.16627600    4.63209500   -1.93481900
 H                  3.48104100    5.55400800   -1.87276800
 H                  5.10797300    4.64877400   -0.21458300
 H                 -5.63151400   -1.22549900   -0.98884300
 H                 -5.79389900   -0.53468200   -2.60624100
 H                 -5.41172100    0.50815200   -1.23370300
 H                 -2.33451300    2.41322600   -2.09568700
 H                 -4.06238700    2.08526300   -2.12017600
 H                 -3.12841900    1.99635900   -3.62014700
 H                 -0.91525500   -3.11128000   -3.82181300
 H                 -0.85787700   -3.66924600   -2.14973100
 H                  0.27829300   -2.43518600   -2.71282300
 H                 -3.80120100   -3.82467100   -2.76170600
 H                 -4.68204900   -3.25199700   -1.34373600
 H                 -3.07061100   -3.95366800   -1.15884600
 H                 -2.68134000    0.45154800    1.86991100
 H                 -4.13842600    0.50854800    0.87564000
 H                 -5.07093500    2.55706500    0.27574100
 H                 -0.93608900    2.43951200    1.41180700
 H                 -0.83689500    4.90104700    1.32851400
 H                 -2.85808200    6.22006200    0.69668100
 H                 -4.97805400    5.01836600    0.16735900
 H                  4.32879400   -2.60152000    0.92366000
 H                  4.18706500   -3.09136100    2.61871700
 H                  4.56510600   -1.41655900    2.20159600
 H                 -0.05871300    1.21551100   -2.55683900
 H                 -0.66192000    0.84473400   -4.17980700
 H                  0.44435200   -0.26664800   -3.36855000
 H                 -5.16593400   -3.72424800    3.33156900
 H                 -6.40237100   -3.69828800    2.04710600
 H                 -6.26431400   -2.32676200    3.17906700

100
A1
 C                 -1.57448400    1.40372500   -0.43186000
 C                 -2.81433500    2.17540400   -0.69156700
 C                 -3.73446100    2.44743500    0.34448200
 C                 -3.11944900    2.70445600   -1.96240800
 C                 -4.90188000    3.17639100    0.11691300
 C                 -5.19518200    3.66633000   -1.15943400
 C                 -4.28819300    3.43062800   -2.19491100
 H                 -0.75232300    1.75735500   -1.06376000
 H                 -1.26881700    1.53583200    0.61488700
 H                 -3.51138000    2.09345700    1.34921700
 H                 -2.41203300    2.56236500   -2.77532700
 H                 -5.57581500    3.38236600    0.94640000
 H                 -6.10062700    4.24032300   -1.33719000
 H                 -4.48374400    3.82632500   -3.18907600
 C                 -1.33307700   -2.21742700    1.28616600
 C                 -1.78607300   -1.59008700    2.55957900
 C                 -1.03469200   -0.58776900    3.20941500
 C                 -3.00817200   -1.96251800    3.15910600
 C                 -3.45710100   -1.36999700    4.33948000
 C                 -2.69689200   -0.37776200    4.96463400
 C                 -1.48188300    0.00473000    4.39113400
 H                 -0.29026200   -2.54299400    1.34886300
 H                 -1.95611600   -3.08026000    1.03562200
 H                 -0.09793100   -0.26740600    2.76306100
 H                 -3.60030700   -2.75017800    2.69605800
 H                 -4.39631000   -1.69548400    4.78238800
 H                 -3.04128300    0.08233800    5.88701000
 H                 -0.87531000    0.77191000    4.86733600
 C                 -0.48944400   -2.71408600   -1.66846200
 C                  0.22299500   -1.59670200   -2.21572900
 C                 -1.87815200   -2.53793300   -1.92630800
 C                 -2.04298500   -1.29702800   -2.61486000
 C                 -0.75396900   -0.71651400   -2.78953600
 C                  0.15007100   -3.93661000   -1.07711500
 C                 -3.32777300   -0.77410800   -3.19583600
 C                 -0.45301100    0.47527000   -3.65608200
 C                  1.69935400   -1.40764400   -2.18424700
 Ti                -1.07448300   -0.77449900   -0.38730700
 O                  0.58997600   -0.26670100    0.38596200
 C                  4.48924400    0.04858600    0.47861900
 C                  4.64395000   -0.98654500   -0.48371400
 C                  3.63725100   -0.44151100    1.51925200
 C                  3.29568200   -1.79230000    1.21010300
 C                  3.92251700   -2.12737300   -0.02971600
 C                  5.26046100    1.33549200    0.51413500
 C                  3.27367900    0.30653200    2.77421600
 C                  3.99219000   -3.49341800   -0.65225100
 C                  5.47888900   -0.91719800   -1.73269900
 Ti                 2.21214600   -0.35623400   -0.36140900
 C                 -2.95762400   -3.54812900   -1.65828100
 C                  2.55329100   -2.73890000    2.11455300
 H                  0.54474200   -4.58720600   -1.87050400
 H                 -0.55748500   -4.52700600   -0.48914400
 H                  0.98661300   -3.67753100   -0.42387800
 H                 -4.19624600   -1.28495500   -2.77036900
 H                 -3.35579500   -0.93944000   -4.28202800
 H                 -3.45904200    0.29739100   -3.01938200
 H                  0.15100400    1.24028000   -3.15937400
 H                 -1.37280100    0.95451000   -4.00029600
 H                  0.10553400    0.15711800   -4.54740500
 H                  2.03144700   -0.71380900   -2.96903900
 H                  2.22317000   -2.35529800   -2.32535900
 H                  5.44830400    1.73532100   -0.48665800
 H                  6.23932700    1.16902900    0.98690100
 H                  4.74511100    2.11141100    1.08294600
 H                  3.03651100    1.35523900    2.56827700
 H                  4.10600100    0.29114400    3.49204400
 H                  2.40645900   -0.13815500    3.27092000
 H                  4.07251900   -3.44651900   -1.74310400
 H                  3.12383000   -4.11090400   -0.40806000
 H                  4.88043500   -4.02964500   -0.28914800
 H                  6.48827700   -1.31750700   -1.56107900
 H                  5.59654400    0.11317800   -2.08288200
 H                  5.03775500   -1.49695100   -2.55094800
 H                 -3.92901200   -3.07544300   -1.48490000
 H                 -2.73146100   -4.16583200   -0.78407100
 H                 -3.07370600   -4.22720600   -2.51455900
 H                  1.76652500   -2.23619500    2.68427000
 H                  3.24089300   -3.19586600    2.84052300
 H                  2.08491900   -3.55736800    1.55980700
 C                  2.39989400    1.61164800   -1.17261000
 C                  2.46734700    2.86977300   -0.36287400
 C                  3.37507000    3.89525100   -0.68677000
 C                  1.61301200    3.08808200    0.73581600
 C                  1.66696800    4.27223800    1.47195600
 C                  2.58140500    5.27435300    1.13783600
 C                  3.43603500    5.07802300    0.05157300
 H                  1.43408500    1.56898400   -1.70064900
 H                  3.18409800    1.59973500   -1.94237500
 H                  4.03892200    3.76237000   -1.53863300
 H                  0.90064500    2.31553100    1.00856800
 H                  0.99028300    4.41156300    2.31185000
 H                  2.62377100    6.19565500    1.71276400
 H                  4.14927600    5.84997400   -0.22803300
 C                 -3.18494000   -0.72497200    0.06955600
 N                 -4.31843800   -0.68654700    0.34800300
 C                 -5.66307000   -0.52415400    0.77051300
 H                 -5.71379800   -0.67381300    1.85323600
 H                 -6.30118000   -1.26018900    0.27276700
 H                 -5.99831700    0.48609000    0.51895000

100
B1
 C                 -3.45056000   -0.93291700    1.64303100
 N                 -4.10060800   -1.16203500    2.58918800
 C                 -4.85135600   -1.43675600    3.76217000
 C                  1.24398400   -2.66050300    0.54334500
 C                  0.08908300   -2.21153400    1.26570000
 C                  2.41494300   -2.27647800    1.27200300
 C                  1.99312700   -1.55790600    2.42043900
 C                  0.56312900   -1.49925300    2.40817900
 C                  1.21532900   -3.52718500   -0.68476700
 C                  2.88266800   -1.10744900    3.54333800
 C                 -0.29110200   -0.89903600    3.48913600
 C                 -1.32878000   -2.40508700    0.84853100
 Ti                 1.20133600   -0.29707200    0.43720700
 C                  1.64936200    1.47897600    1.60590700
 C                  2.34189500   -0.20711200   -1.35964000
 C                  3.70992900   -0.67738700   -1.69600700
 C                  3.91041200   -1.76058900   -2.57508200
 C                  4.85884200   -0.05783500   -1.16405200
 C                  6.13773600   -0.51848200   -1.47481200
 C                  6.31477600   -1.61120100   -2.32795000
 C                  5.18967400   -2.22642600   -2.88110600
 C                  2.85922700    2.25509100    1.20458200
 C                  2.82464800    3.17245900    0.13405400
 C                  4.08653600    2.10991900    1.88208500
 C                  3.95556200    3.89236900   -0.24783100
 C                  5.16463000    3.72580900    0.43284700
 C                  5.21930300    2.83212800    1.50507400
 O                 -0.42813300    0.10911700   -0.27405700
 C                 -4.28230200   -0.08001400   -1.31927500
 C                 -4.29225400   -1.47884500   -1.02603800
 C                 -3.15273500    0.18302600   -2.14503600
 C                 -2.45499700   -1.04895600   -2.34748700
 C                 -3.17113100   -2.07791900   -1.66905600
 C                 -5.37481400    0.88570700   -0.96150300
 C                 -2.82974600    1.47032800   -2.85051700
 C                 -2.94008600   -3.55719100   -1.79446400
 C                 -5.40691300   -2.23072300   -0.35148300
 Ti                -2.16969200   -0.47193500   -0.05581100
 C                 -2.62000500    1.47152400    0.99987000
 C                 -2.47909200    2.77864300    0.28526400
 C                 -3.54732400    3.70009900    0.27970700
 C                 -1.29879700    3.17265800   -0.37630900
 C                 -1.19354500    4.41388100   -1.00284000
 C                 -2.26920700    5.30569600   -1.00478200
 C                 -3.45048300    4.93802700   -0.35786400
 C                  3.83049300   -2.69288500    0.98623400
 C                 -1.27561700   -1.22573300   -3.26247600
 H                  0.48011300   -3.17854400   -1.41698100
 H                  0.94818800   -4.56105300   -0.42334100
 H                  2.18781700   -3.55150100   -1.18144300
 H                  3.89542100   -0.88352000    3.19494900
 H                  2.96884700   -1.89572800    4.30534600
 H                  2.49695200   -0.21621900    4.04887400
 H                  0.18307000   -0.02982200    3.95661400
 H                 -0.48184400   -1.63149900    4.28761700
 H                 -1.26155900   -0.57638800    3.10343100
 H                 -1.91181600   -2.81760100    1.67812000
 H                 -1.36984900   -3.13668300    0.04184700
 H                  1.67275200    1.25206700    2.67420500
 H                  0.73886600    2.06173100    1.41116600
 H                  2.29488100    0.89758500   -1.36001200
 H                  1.61064100   -0.55987900   -2.09816000
 H                  3.04502000   -2.23529000   -3.03304700
 H                  4.74515700    0.79642300   -0.50316700
 H                  7.00305400   -0.01534300   -1.04913100
 H                  7.31278500   -1.96774400   -2.56890200
 H                  5.30708900   -3.06495000   -3.56403800
 H                  1.88745800    3.33044700   -0.39527900
 H                  4.14517000    1.42738000    2.72587300
 H                  3.89028900    4.59369100   -1.07644300
 H                  6.04559600    4.28960600    0.13838000
 H                  6.14792100    2.69873800    2.05555900
 H                 -5.76806500    0.70634900    0.04547700
 H                 -6.21804600    0.79073700   -1.66061000
 H                 -5.02665800    1.91930100   -1.00016900
 H                 -1.75444900    1.66817400   -2.87206700
 H                 -3.30918300    2.33166000   -2.38278300
 H                 -3.17539600    1.41574600   -3.89320500
 H                 -3.56368000   -3.96974500   -2.60032600
 H                 -3.19567100   -4.09834000   -0.87767600
 H                 -1.90111600   -3.79399500   -2.04096300
 H                 -6.11670600   -2.61532700   -1.09756500
 H                 -5.97518300   -1.59264800    0.33214800
 H                 -5.03848600   -3.09192200    0.21609700
 H                 -1.81386000    1.34753400    1.73963900
 H                 -3.56175500    1.48453500    1.55683300
 H                 -4.46504900    3.44420400    0.80563400
 H                 -0.46985800    2.47615400   -0.41560200
 H                 -0.26500200    4.68461100   -1.50091400
 H                 -2.18589200    6.27135800   -1.49629200
 H                 -4.29656300    5.62132200   -0.33653500
 H                  3.97863500   -2.96417400   -0.06018000
 H                  4.09950200   -3.56436200    1.60078100
 H                  4.54693500   -1.89724000    1.21203700
 H                 -0.57957800   -0.38526900   -3.18767900
 H                 -1.60259800   -1.29262000   -4.30996300
 H                 -0.71584900   -2.13863000   -3.03884200
 H                 -5.73630900   -2.02513600    3.50275600
 H                 -5.16729900   -0.49965000    4.23021300
 H                 -4.23836600   -2.00472700    4.46844000

100
TSA1A11
 C                  1.74824000    1.54979100   -0.82625100
 C                  2.56800600    2.74967200   -1.08682900
 C                  3.60222400    2.72375000   -2.04259200
 C                  2.34587000    3.96044000   -0.40201600
 C                  4.37790400    3.85433800   -2.29881800
 C                  4.14858700    5.04197400   -1.60162400
 C                  3.12402200    5.08925300   -0.65220500
 H                  0.76447400    1.82416300   -0.43708300
 H                  1.62427600    0.91714000   -1.70735700
 H                  3.78182000    1.80946100   -2.60077900
 H                  1.53350200    4.02147200    0.31714600
 H                  5.16252900    3.80759400   -3.05028000
 H                  4.75174200    5.92338000   -1.80288800
 H                  2.92180000    6.01207100   -0.11374100
 C                  2.07849000   -2.34855300    0.50120100
 C                  2.78468400   -2.59509400   -0.79289500
 C                  4.14018800   -2.98133200   -0.81006700
 C                  2.14330300   -2.45225200   -2.04037400
 C                  2.82153000   -2.68772900   -3.23715100
 C                  4.16465800   -3.07032700   -3.23018800
 C                  4.82010300   -3.21678100   -2.00482900
 H                  1.14727000   -2.92517100    0.56094200
 H                  2.71430600   -2.64069400    1.34086900
 H                  4.66014800   -3.11515600    0.13685500
 H                  1.10656900   -2.13157700   -2.06077300
 H                  2.29576700   -2.57002900   -4.18217800
 H                  4.69089300   -3.25607500   -4.16273300
 H                  5.86271900   -3.52646400   -1.97874600
 C                 -2.31273000    1.31968900   -0.86467600
 C                 -3.53024300    2.16303100   -0.66998500
 C                 -4.29382600    2.61383800   -1.76521100
 C                 -3.94793100    2.58214800    0.60923300
 C                 -5.07481700    3.38402900    0.78679400
 C                 -5.83084600    3.79612600   -0.31311400
 C                 -5.42789900    3.40871100   -1.59238900
 H                 -2.06627600    1.22092400   -1.93115100
 H                 -1.44031300    1.80708900   -0.40462900
 H                 -3.97913900    2.34767400   -2.77106900
 H                 -3.37549900    2.28025300    1.48181100
 H                 -5.36305400    3.68854600    1.79031000
 H                 -6.71066000    4.41890700   -0.17612700
 H                 -5.98978500    3.73713300   -2.46363500
 C                  0.62443500   -1.06827600    2.85458100
 C                 -0.31417700   -0.06734100    2.42099200
 C                  1.88706200   -0.44193000    3.07272200
 C                  1.75549700    0.93775900    2.75044900
 C                  0.40162700    1.17091800    2.35437800
 C                  0.28344800   -2.48295400    3.22879100
 C                  2.80685400    1.99466400    2.95011400
 C                 -0.21690300    2.53026000    2.16790500
 C                 -1.74305300   -0.29241500    2.06624200
 Ti                 1.28293400   -0.33427300    0.69165500
 O                 -0.14670900   -0.69614200   -0.49158700
 C                 -3.74459100   -1.38796500   -1.50512900
 C                 -4.25407500   -1.48838000   -0.18024100
 C                 -2.62450500   -2.26939500   -1.61829100
 C                 -2.45347800   -2.92730900   -0.36667600
 C                 -3.46041400   -2.43854700    0.52536000
 C                 -4.37765900   -0.66641700   -2.65909700
 C                 -1.86000600   -2.53365200   -2.88697400
 C                 -3.76348800   -2.97507400    1.89596200
 C                 -5.46873900   -0.78742000    0.36288400
 Ti                -1.89163900   -0.63185800   -0.07530300
 C                  3.10432300   -1.09652200    3.66058400
 C                 -1.48702500   -4.04647200   -0.09210900
 H                  0.07409900   -2.54921400    4.30578000
 H                  1.09751500   -3.18035900    3.01065800
 H                 -0.60714700   -2.83712200    2.70464200
 H                  3.80889300    1.55901400    2.98884300
 H                  2.64349000    2.52567400    3.89841500
 H                  2.80804600    2.73794800    2.14789800
 H                 -0.90748600    2.73924000    2.99684500
 H                 -0.79393200    2.63830800    1.24551900
 H                  0.54345600    3.31495300    2.17610900
 H                 -2.33587000    0.61954800    2.21512000
 H                 -2.18774700   -1.08057700    2.67552600
 H                 -5.01567000    0.15578300   -2.33107500
 H                 -5.00168700   -1.36254400   -3.23783600
 H                 -3.63062200   -0.25796500   -3.34818900
 H                 -0.90893300   -3.03479900   -2.69140700
 H                 -1.64020100   -1.60953500   -3.43288300
 H                 -2.44009900   -3.17915100   -3.56149100
 H                 -2.87495000   -3.38420300    2.38652500
 H                 -4.50014500   -3.78841200    1.83512500
 H                 -4.18455100   -2.20880300    2.55490700
 H                 -6.36536000   -1.41183700    0.23989500
 H                 -5.65391400    0.16296600   -0.14368500
 H                 -5.36985600   -0.57335100    1.43233700
 H                  4.02990300   -0.64771700    3.28683300
 H                  3.13975400   -2.16715800    3.43933800
 H                  3.10925200   -0.99191000    4.75492000
 H                 -0.55224800   -3.92523700   -0.64637000
 H                 -1.92186100   -5.01107100   -0.39030200
 H                 -1.23398300   -4.12463700    0.96910000
 C                  3.14772700    0.31924600    0.20527000
 N                  4.28103700    0.64213900   -0.06926200
 C                  5.57615100    0.08440800    0.24063800
 H                  5.96419400   -0.40909400   -0.65583500
 H                  5.54073200   -0.64779700    1.05649300
 H                  6.26060500    0.89601700    0.50505300

100
TSB1B11
 C                 -2.13384500    1.22601400   -0.14707500
 C                 -3.37204800    2.02326700   -0.20399900
 C                 -3.93889800    2.57352700    0.96406100
 C                 -4.01775200    2.30070100   -1.42597300
 C                 -5.17624700    3.07167500   -1.47959100
 C                 -5.72814700    3.59676400   -0.30725300
 C                 -5.09727100    3.34906400    0.91287900
 H                 -1.60517700    1.22350800   -1.10226500
 H                 -1.45733400    1.55863200    0.64030500
 H                 -3.44422300    2.41243600    1.91738400
 H                 -3.58669300    1.92273000   -2.34943100
 H                 -5.64398600    3.27405800   -2.44010700
 H                 -6.62836500    4.20419500   -0.34805500
 H                 -5.50281800    3.76936400    1.83019300
 C                  1.57605600    2.32144400    1.44610000
 C                  1.94063900    3.15609700    0.26414800
 C                  1.03548500    3.39946000   -0.78770200
 C                  3.22186100    3.73520100    0.15723400
 C                  1.39362000    4.17839600   -1.88823400
 C                  2.67171200    4.73569200   -1.97779200
 C                  3.58414900    4.50957500   -0.94387600
 H                  0.52338600    2.46000500    1.72631400
 H                  0.03738900    2.97415500   -0.73404900
 H                  3.93948500    3.58000600    0.96122200
 H                  0.66742500    4.35398900   -2.67867000
 H                  2.95016600    5.34245700   -2.83521600
 H                  4.57990800    4.94404900   -0.99117400
 C                  3.65093400    0.04293300    0.10602400
 C                  3.70840700   -0.30591400   -1.34258200
 C                  4.21217600   -1.55290200   -1.76138800
 C                  3.28868600    0.59155400   -2.34581700
 C                  3.36900800    0.25319600   -3.69667500
 C                  3.87142300   -0.99035000   -4.09203500
 C                  4.29429000   -1.89169400   -3.11231100
 H                  4.37007600   -0.55127700    0.67247600
 H                  3.90205100    1.10560600    0.26194100
 H                  4.56100500   -2.25972200   -1.01084800
 H                  2.90819400    1.56829800   -2.06077400
 H                  3.04794900    0.97315800   -4.44621100
 H                  3.94193800   -1.24755700   -5.14570200
 H                  4.69984800   -2.85915600   -3.40026000
 C                  1.98848000   -1.84771700    2.19688100
 C                  0.61649700   -1.46133200    2.35536000
 C                  2.80644400   -0.93961200    2.94336400
 C                  1.95601400    0.04097900    3.51382700
 C                  0.60993100   -0.26389500    3.13717700
 C                  2.45922200   -3.07648600    1.46761700
 C                  2.37797900    1.11177600    4.47905300
 C                 -0.60656600    0.46293300    3.63964300
 C                 -0.55318900   -2.15897700    1.74879200
 Ti                 1.73052100    0.20097900    1.04796100
 O                  0.43078800   -0.10475900   -0.17657500
 C                 -2.68061700   -2.86516800   -0.92105500
 C                 -1.33120700   -3.29719000   -1.04467300
 C                 -2.86665900   -1.73537700   -1.77510700
 C                 -1.61867500   -1.45022100   -2.40457800
 C                 -0.66750300   -2.41555200   -1.95732900
 C                 -3.76225700   -3.56066700   -0.14332400
 C                 -4.19727300   -1.09505100   -2.05765900
 C                  0.72966100   -2.56593100   -2.48742100
 C                 -0.77982100   -4.58646500   -0.50541600
 Ti                -1.15075400   -1.07337400   -0.09614100
 C                  4.28065100   -1.06140800    3.21121400
 C                 -1.33767400   -0.39252600   -3.43781200
 H                  2.11373600   -3.10234200    0.42834500
 H                  2.09003000   -3.98730800    1.95868300
 H                  3.55063100   -3.13643400    1.44444700
 H                  3.39748900    1.46027200    4.28235600
 H                  2.35886200    0.73321900    5.51107400
 H                  1.71658200    1.98284600    4.44325100
 H                 -1.46974100    0.31476600    2.98718800
 H                 -0.43476300    1.54095100    3.72684300
 H                 -0.88655100    0.10007600    4.63935400
 H                 -1.38885300   -2.20392400    2.45287100
 H                 -0.27778900   -3.18451600    1.49890300
 H                 -3.38783500   -3.96494300    0.80299900
 H                 -4.17688800   -4.40338500   -0.71496200
 H                 -4.59051600   -2.88341100    0.08414100
 H                 -4.66218200   -0.66455800   -1.16491500
 H                 -4.89069400   -1.84228700   -2.46605700
 H                 -4.11114200   -0.29585500   -2.79578000
 H                  1.21254800   -1.60243200   -2.66488200
 H                  0.71794500   -3.11193100   -3.44168300
 H                  1.37023500   -3.12827100   -1.80335200
 H                 -0.94476500   -5.39692100   -1.22935800
 H                 -1.26686400   -4.88255700    0.42859100
 H                  0.29683200   -4.53409700   -0.32102000
 H                  4.79326100   -0.09429600    3.15555900
 H                  4.77443100   -1.73363100    2.50453100
 H                  4.45769200   -1.46503000    4.21790600
 H                 -0.37173400    0.09318200   -3.26504400
 H                 -2.10688700    0.38447900   -3.44837100
 H                 -1.30480100   -0.83401300   -4.44337800
 C                 -2.82742700   -0.55807100    0.95540700
 N                 -3.81213500   -0.29524000    1.60046600
 C                 -4.61939000   -0.95381500    2.59798700
 H                 -5.65320000   -1.00277500    2.24260300
 H                 -4.61478400   -0.35025700    3.51119900
 H                 -4.26579500   -1.96525600    2.83009800
 H                  2.19391400    2.58557100    2.30953600

100
TSB1B12
 C                  2.00857700   -4.36982400   -2.44326900
 C                  2.09543900   -2.14838100   -1.33719400
 N                  2.29395700   -2.98146600   -2.19602900
 H                  2.94696500   -4.89971800   -2.63576600
 H                  1.39237500   -4.45042000   -3.34451000
 H                  1.48372300   -4.85133600   -1.60871000
 C                 -2.31189200    0.57620800   -0.92028500
 C                 -3.68156400    0.45359100   -1.48190000
 C                 -4.82832700    0.73748300   -0.71300100
 C                 -3.88799800    0.05585000   -2.81777700
 C                 -6.11145700    0.61481400   -1.24475800
 C                 -6.29336700    0.19972200   -2.56664300
 C                 -5.17084700   -0.07510700   -3.35074200
 H                 -1.55429200    0.57184700   -1.71480800
 H                 -2.19068700    1.53368600   -0.38295800
 H                 -4.70814900    1.05917600    0.31902000
 H                 -3.02280000   -0.13755600   -3.44866300
 H                 -6.97399900    0.84681500   -0.62406800
 H                 -7.29301200    0.10440200   -2.98177800
 H                 -5.29274400   -0.38179200   -4.38704300
 C                 -2.24503900    0.45535200    2.40098000
 C                 -1.80819900    1.87212900    2.56993200
 C                 -0.69972500    2.19257900    3.37962100
 C                 -2.47205000    2.94341500    1.94111000
 C                 -2.04254100    4.26206600    2.09990900
 C                 -0.93635100    4.55498700    2.90001900
 C                 -0.27078300    3.50827500    3.54498300
 H                 -1.98870300   -0.13888900    3.28485400
 H                 -3.33082100    0.37433000    2.24802800
 H                 -0.17882000    1.38853500    3.89548400
 H                 -3.34669700    2.74173000    1.32693000
 H                 -2.58397000    5.06421300    1.60388900
 H                 -0.60480300    5.58164900    3.02890200
 H                  0.58163200    3.71952700    4.18669900
 C                 -1.08182200   -2.55367700    1.80124300
 C                 -0.41194000   -2.63968600    0.53811600
 C                 -2.49060300   -2.51021700    1.56652400
 C                 -2.69993400   -2.55926700    0.16253500
 C                 -1.42142500   -2.61734600   -0.47758000
 C                 -0.42078300   -2.59820200    3.15258300
 C                 -4.03547300   -2.71464000   -0.50886800
 C                 -1.22602400   -2.74904100   -1.96354700
 C                  1.07842400   -2.72888800    0.40892000
 Ti                -1.39711400   -0.49682200    0.66695300
 O                  0.31739200    0.07017600    0.54464100
 C                  4.41485800   -0.80719900   -0.21368600
 C                  3.94095900   -1.28416000    1.04826100
 C                  4.12907600    0.58498600   -0.29606900
 C                  3.45957700    0.96807700    0.90927600
 C                  3.35035500   -0.18828300    1.74091900
 C                  5.23138400   -1.58521700   -1.20653200
 C                  4.66255300    1.50699000   -1.35293300
 C                  2.80939000   -0.18988200    3.14432300
 C                  4.17874700   -2.66712500    1.58915300
 Ti                 1.94422500   -0.48139800   -0.16970600
 C                 -3.56892700   -2.55679800    2.61316700
 C                  3.05818300    2.36367900    1.30070800
 H                 -1.15024300   -2.45402700    3.95448200
 H                  0.35074000   -1.83008900    3.27108900
 H                  0.05977600   -3.57177600    3.31949300
 H                 -4.81733800   -2.12888600   -0.01755000
 H                 -4.34739200   -3.76896500   -0.48305700
 H                 -4.01455900   -2.40035100   -1.55350000
 H                 -2.05138300   -2.28929400   -2.51370700
 H                 -1.19092000   -3.80776000   -2.25846100
 H                 -0.30032500   -2.28253000   -2.30653100
 H                  1.39372100   -3.74045700    0.13815200
 H                  1.54507600   -2.53489600    1.37585700
 H                  5.07684500   -2.66310900   -1.10528100
 H                  6.30346000   -1.39087500   -1.06077700
 H                  4.98511400   -1.31375300   -2.23768500
 H                  4.08642100    2.43033500   -1.42819100
 H                  4.66163700    1.03728500   -2.34129300
 H                  5.70261700    1.77781200   -1.12007500
 H                  1.89807500    0.41018000    3.22668200
 H                  3.54484700    0.23378000    3.84251900
 H                  2.58006500   -1.20050800    3.49486800
 H                  5.21631700   -2.76871200    1.93538300
 H                  4.01208400   -3.44094800    0.83237800
 H                  3.53261600   -2.89399000    2.44214100
 H                 -4.52135100   -2.18613200    2.22238100
 H                 -3.32253600   -1.95852800    3.49581300
 H                 -3.73620500   -3.58802200    2.95395600
 H                  2.16500400    2.37053500    1.93243800
 H                  2.84324200    2.98447400    0.42794900
 H                  3.86872300    2.84728600    1.86513200
 C                  1.61326300    0.48059300   -2.08838100
 C                  1.46017800    1.96903600   -2.22389600
 C                  0.67533800    2.73900200   -1.34330800
 C                  2.08553500    2.65158500   -3.28652300
 C                  1.93699400    4.02757600   -3.46429800
 C                  1.15119200    4.77015700   -2.58020800
 C                  0.52062800    4.11510500   -1.51997800
 H                  0.64349600   -0.00940700   -2.27971700
 H                  2.30285900    0.10222600   -2.84981800
 H                  0.19198400    2.25220500   -0.50347600
 H                  2.68911900    2.08468000   -3.99249700
 H                  2.43169600    4.51838600   -4.29945500
 H                  1.03024700    5.84163400   -2.71725600
 H                 -0.09348200    4.67379200   -0.81769400

100
A11
 C                 -2.49521300    1.20859700   -1.43735400
 C                 -3.94123400    1.61488000   -1.22797700
 C                 -4.32635800    2.29048000   -0.06116500
 C                 -4.92001600    1.32817500   -2.18939100
 C                 -5.65795100    2.65052700    0.14869800
 C                 -6.62733200    2.34636900   -0.81010500
 C                 -6.25355600    1.68743600   -1.98321400
 H                 -2.28120200    1.10494100   -2.50997800
 H                 -1.82679400    2.01064500   -1.09801700
 H                 -3.57488300    2.53803700    0.68498800
 H                 -4.63534400    0.81856900   -3.10799700
 H                 -5.93786500    3.17341500    1.05948400
 H                 -7.66412800    2.62854200   -0.64820500
 H                 -6.99838800    1.45735500   -2.74071700
 C                 -0.83330400   -2.55812100    1.65498900
 C                 -1.43247100   -1.77219800    2.77279300
 C                 -0.80626700   -0.62602000    3.30686100
 C                 -2.66082700   -2.15252900    3.35265100
 C                 -3.23551000   -1.43145400    4.40029600
 C                 -2.59654800   -0.29956800    4.91149100
 C                 -1.37551700    0.09387200    4.35708600
 H                  0.21029000   -2.82061900    1.87734200
 H                 -1.39105600   -3.48772400    1.50560600
 H                  0.13086800   -0.29533100    2.86958400
 H                 -3.16101500   -3.04596100    2.98244000
 H                 -4.17994400   -1.76306200    4.82667400
 H                 -3.03767600    0.26083200    5.73167200
 H                 -0.86081800    0.97009600    4.74612000
 C                  0.84973200   -3.23264200   -1.01912200
 C                  1.08009200   -2.09606700   -1.85670700
 C                 -0.48264500   -3.70346900   -1.24355700
 C                 -1.09228300   -2.84223500   -2.19260500
 C                 -0.14138500   -1.84059400   -2.56370200
 C                  1.88190000   -3.89615100   -0.15212800
 C                 -2.46374500   -3.00317300   -2.78708400
 C                 -0.31408300   -0.85749200   -3.68954600
 C                  2.34116500   -1.30450700   -1.91597900
 Ti                -0.56153000   -1.46428500   -0.22302600
 O                  0.75756600   -0.31776700    0.49135800
 C                  4.13322000    1.65551900    0.25316300
 C                  4.73224500    0.60354700   -0.49414000
 C                  3.54975100    1.08252600    1.42731100
 C                  3.81540100   -0.31939300    1.41376200
 C                  4.55434300   -0.61253400    0.22696200
 C                  4.27886200    3.12193500   -0.03298700
 C                  2.90139800    1.84125000    2.55405600
 C                  5.20023300   -1.92487900   -0.11800300
 C                  5.48271200    0.76003800   -1.78828700
 Ti                 2.27082000    0.17152100   -0.33512000
 C                 -1.07713900   -4.96915000   -0.69283700
 C                  3.48668400   -1.27585800    2.52922900
 H                  2.64377800   -4.39764000   -0.76553600
 H                  1.43578100   -4.65220600    0.49955400
 H                  2.40105300   -3.17705000    0.48782400
 H                 -3.10536500   -3.63019600   -2.16055900
 H                 -2.41183800   -3.47933300   -3.77634600
 H                 -2.97289000   -2.04192200   -2.91943200
 H                 -1.37036700   -0.65480800   -3.89183500
 H                  0.11882600   -1.25980300   -4.61685600
 H                  0.17663300    0.10065500   -3.49590300
 H                  2.40212700   -0.70576700   -2.83529000
 H                  3.21851900   -1.95358100   -1.87789000
 H                  4.25512600    3.33876000   -1.10560300
 H                  5.24378700    3.48434900    0.34992800
 H                  3.49250600    3.71522300    0.43777900
 H                  2.33921700    2.70862700    2.19615300
 H                  3.66114000    2.20678000    3.25979900
 H                  2.21029700    1.20903100    3.11986700
 H                  4.63336600   -2.78251500    0.25327000
 H                  6.20305200   -1.98162600    0.32835200
 H                  5.32475200   -2.05072200   -1.19811000
 H                  6.55418800    0.93028800   -1.61079900
 H                  5.11399000    1.61251100   -2.36853000
 H                  5.39811000   -0.13087200   -2.41958600
 H                 -0.86962900   -5.81702600   -1.36074700
 H                 -2.16466300   -4.89930100   -0.58582300
 H                 -0.66849100   -5.22208000    0.28943200
 H                  2.46394500   -1.14549000    2.89681900
 H                  4.16378800   -1.12496000    3.38154600
 H                  3.59288100   -2.31852200    2.21636800
 C                  1.55269200    1.85639700   -1.43777300
 C                  1.00719900    3.08227300   -0.77106100
 C                  1.30645400    4.36923500   -1.25732400
 C                  0.16001500    3.00056100    0.35382800
 C                 -0.36198700    4.14864600    0.95379800
 C                 -0.04915400    5.41566500    0.45538900
 C                  0.79087400    5.51805100   -0.65523000
 H                  0.72927400    1.29327300   -1.90710700
 H                  2.25802600    2.12469800   -2.23569600
 H                  1.95004300    4.46644300   -2.12912400
 H                 -0.07253400    2.02247800    0.76549800
 H                 -1.00859100    4.05062800    1.82304600
 H                 -0.45349400    6.30838600    0.92494400
 H                  1.04263300    6.49552400   -1.06000700
 C                 -1.98755100   -0.05584300   -0.79052900
 N                 -2.55473700   -0.98755500   -0.13810900
 C                 -3.92533900   -1.27105400    0.27098800
 H                 -4.65377100   -0.68428100   -0.29080800
 H                 -4.02086000   -1.05921700    1.33960100
 H                 -4.11348200   -2.33895500    0.12465500

100
B11
 C                  1.79448400    2.14392600   -2.37755800
 C                  1.52308900    3.34439600   -1.48873900
 C                  2.04776000    4.59694500   -1.83104200
 C                  0.72018400    3.23974600   -0.34455400
 C                  0.44750000    4.36735200    0.43410800
 C                  0.97079000    5.61341800    0.08161400
 C                  1.77372600    5.72502800   -1.05484500
 H                  0.94618800    2.00932600   -3.07119700
 H                  2.66418600    2.34482600   -3.02034800
 H                  2.67690900    4.69227700   -2.71403200
 H                  0.31983600    2.27288100   -0.05435300
 H                 -0.17303700    4.26338500    1.32034400
 H                  0.75776100    6.48895800    0.68906100
 H                  2.19125000    6.68808100   -1.33695500
 C                 -2.11164300    0.37757800   -1.75136000
 C                 -3.25257100    1.25964000   -1.36179300
 C                 -3.04716500    2.55650800   -0.85210900
 C                 -4.58872600    0.82998900   -1.50177400
 C                 -4.11802800    3.37696500   -0.49233900
 C                 -5.43250800    2.92697100   -0.62871800
 C                 -5.65931900    1.64626100   -1.14090100
 H                 -1.19890400    0.97041400   -1.89937800
 H                 -2.03151200    2.93054600   -0.75297900
 H                 -4.78597800   -0.15955500   -1.90820400
 H                 -3.92144700    4.37617200   -0.11024600
 H                 -6.26671800    3.56523400   -0.35041000
 H                 -6.67698800    1.28308800   -1.26570800
 C                 -2.79889700   -0.92015500    1.41606600
 C                 -2.31455900   -0.09919400    2.56192600
 C                 -1.77367400   -0.71319000    3.70955000
 C                 -2.37969600    1.30825900    2.55526300
 C                 -1.91218800    2.06044400    3.63342300
 C                 -1.36835600    1.43313300    4.75744700
 C                 -1.30803100    0.03717500    4.78900400
 H                 -3.15742900   -1.89219100    1.75991600
 H                 -3.62612600   -0.42356900    0.88382100
 H                 -1.72899900   -1.79977600    3.75487200
 H                 -2.81767000    1.81319800    1.69881100
 H                 -1.98920700    3.14537800    3.60161400
 H                 -1.01289000    2.01988200    5.60038300
 H                 -0.90486400   -0.47069800    5.66239500
 C                 -0.96541700   -3.34456300    0.02020200
 C                 -0.10026700   -2.87207400   -1.02199500
 C                 -2.31304500   -3.33469600   -0.46264400
 C                 -2.29912000   -2.80481000   -1.77665800
 C                 -0.94287300   -2.50037300   -2.11707100
 C                 -0.51861300   -3.91528700    1.33666100
 C                 -3.48622900   -2.72943500   -2.69531300
 C                 -0.46653200   -2.01972400   -3.45992900
 C                  1.37801600   -2.73405500   -0.93361100
 Ti                -1.43506200   -1.04922200   -0.24058300
 O                  0.12442000   -0.30806200    0.30842500
 C                  4.26451800   -0.90444900    0.22810100
 C                  3.58961900   -1.83015800    1.07650700
 C                  3.86802700    0.41242000    0.60304900
 C                  2.92815300    0.29937400    1.67419300
 C                  2.76146100   -1.08276400    1.96933400
 C                  5.29472000   -1.26822600   -0.80568100
 C                  4.45955800    1.69222400    0.07852100
 C                  1.96247000   -1.61224800    3.12738500
 C                  3.87971700   -3.30236900    1.14502900
 Ti                 1.86102700   -0.67451300   -0.23775200
 C                 -3.50862200   -3.93247900    0.22439500
 C                  2.29953700    1.42489400    2.44698100
 H                 -1.26427300   -3.76320500    2.12361900
 H                  0.41226200   -3.45887500    1.67793700
 H                 -0.34520900   -4.99829400    1.25552400
 H                 -4.42480900   -2.67070300   -2.13494900
 H                 -3.54496300   -3.62492900   -3.33066800
 H                 -3.44722100   -1.86392700   -3.36445400
 H                  0.04267100   -1.05200800   -3.40742700
 H                 -1.29655900   -1.91573300   -4.16448500
 H                  0.24224600   -2.73794800   -3.89366400
 H                  1.84868500   -2.89503500   -1.90905100
 H                  1.77694400   -3.47807700   -0.24248200
 H                  5.01634500   -2.17132200   -1.36018300
 H                  6.27175300   -1.46240200   -0.34054400
 H                  5.44137500   -0.46350100   -1.53298200
 H                  4.76319300    1.60533300   -0.97039300
 H                  5.35953900    1.96077000    0.64971700
 H                  3.76147800    2.52993400    0.15333800
 H                  0.94593800   -1.20731800    3.14754800
 H                  2.44029800   -1.33354600    4.07729500
 H                  1.89523100   -2.70348600    3.11188600
 H                  4.77543300   -3.48573200    1.75536800
 H                  4.06834200   -3.73120900    0.15549500
 H                  3.05989100   -3.86671200    1.59909000
 H                 -4.40653600   -3.31481700    0.11217300
 H                 -3.33580600   -4.07033400    1.29532000
 H                 -3.73837500   -4.92221000   -0.19446800
 H                  1.25694500    1.21019800    2.70095400
 H                  2.31923400    2.36353600    1.88767300
 H                  2.84054600    1.59062600    3.38993700
 C                  1.96686700    0.82112000   -1.68139300
 N                  2.36469300   -0.26963600   -2.20709900
 C                  2.82630800   -0.55283800   -3.55905700
 H                  3.91074400   -0.40178000   -3.61242500
 H                  2.34266700    0.09533200   -4.29931900
 H                  2.61675200   -1.59675200   -3.80408600
 H                 -2.33114900   -0.13369500   -2.69110100

100
B12
 C                  1.43307300   -2.43533900   -0.78342200
 N                  2.01665000   -1.98839600   -1.81806900
 C                 -1.30336800   -3.01403600    1.27977800
 C                 -0.87537200   -3.05588300   -0.07636700
 C                 -2.68467100   -2.65040000    1.28883600
 C                 -3.09981900   -2.44402900   -0.05675100
 C                 -1.97486000   -2.66944400   -0.90317100
 C                 -0.50345600   -3.42945600    2.48316600
 C                 -4.51733700   -2.19155700   -0.48884100
 C                 -1.96937300   -2.68209200   -2.40715100
 C                  0.46276200   -3.56043700   -0.58391400
 Ti                -1.33612700   -0.72586700    0.47524900
 C                 -2.04179500    0.63300200   -1.00605900
 C                 -2.02584900    0.12842500    2.32303800
 C                 -1.91008300    1.61110800    2.47710800
 C                 -0.66675900    2.27097300    2.49417700
 C                 -3.06210500    2.40624000    2.63547400
 C                 -2.97938000    3.78900500    2.80185800
 C                 -1.73524000    4.42226000    2.82335200
 C                 -0.57923700    3.65171600    2.67114100
 C                 -3.40888600    0.79867000   -1.56404500
 C                 -4.46151800    1.31132500   -0.77961400
 C                 -3.70319400    0.47791400   -2.90374200
 C                 -5.74661300    1.46312400   -1.29817900
 C                 -6.02471400    1.11024100   -2.62166300
 C                 -4.99030400    0.62306500   -3.42366000
 O                  0.39596800   -0.23353000    0.46236300
 C                  4.41916400    0.18356400   -0.00730900
 C                  4.43847100   -1.23842000   -0.00743200
 C                  3.66315500    0.61259500    1.12981300
 C                  3.22385500   -0.54769200    1.83096700
 C                  3.70252900   -1.69623400    1.12588000
 C                  5.21687500    1.06628500   -0.92285400
 C                  3.49206300    2.03859900    1.57658400
 C                  3.62924900   -3.12308800    1.59651100
 C                  5.18226000   -2.11119400   -0.97962200
 Ti                 2.09345900   -0.57061900   -0.27674400
 C                  1.97072200    0.81961400   -1.95784000
 C                  1.97113900    2.30121500   -1.76186800
 C                  1.05239600    2.94004600   -0.90517100
 C                  2.88305700    3.12846800   -2.44851300
 C                  2.88666000    4.51467800   -2.28200900
 C                  1.96610400    5.12411800   -1.42728300
 C                  1.04535800    4.32522700   -0.74367800
 C                 -3.58802900   -2.69094800    2.48837800
 C                  2.48686600   -0.56407400    3.14195800
 H                  0.57054700   -3.32398300    2.31067600
 H                 -0.69659600   -4.48118200    2.73889600
 H                 -0.75541200   -2.83378200    3.36686900
 H                 -5.01440900   -1.44614100    0.13926500
 H                 -5.10195300   -3.12029700   -0.42261700
 H                 -4.57794700   -1.83065000   -1.51673300
 H                 -1.05641000   -2.23890200   -2.82034000
 H                 -2.81611400   -2.12763100   -2.81610400
 H                 -2.03480300   -3.71177300   -2.78734900
 H                  0.31095800   -4.14078000   -1.50577300
 H                  0.88986000   -4.24815100    0.15574500
 H                 -1.29042300    0.54570300   -1.80302500
 H                 -1.76331800    1.51237600   -0.40241500
 H                 -1.34967500   -0.39573700    3.01768900
 H                 -3.04501400   -0.19278400    2.55357300
 H                  0.23676300    1.68634100    2.35103100
 H                 -4.03761500    1.92375900    2.65070400
 H                 -3.88976000    4.37062100    2.92595500
 H                 -1.66648000    5.49810000    2.96004500
 H                  0.39780600    4.12878900    2.68460100
 H                 -4.25560300    1.60802700    0.24553400
 H                 -2.90165400    0.12753000   -3.55028900
 H                 -6.53529600    1.86616500   -0.66669700
 H                 -7.02616600    1.23066800   -3.02592100
 H                 -5.18116200    0.36864000   -4.46377000
 H                  5.28896300    0.65024200   -1.93338200
 H                  6.24321500    1.17745300   -0.54397000
 H                  4.78551900    2.06552600   -1.00754000
 H                  2.60876900    2.16332900    2.20933300
 H                  3.38910700    2.72515700    0.73298000
 H                  4.36253100    2.35923400    2.16689200
 H                  4.53832300   -3.39331500    2.15256900
 H                  3.54118700   -3.83025900    0.76448300
 H                  2.78340500   -3.29035600    2.26956900
 H                  6.19531000   -2.33368000   -0.61535900
 H                  5.28896800   -1.62982700   -1.95707600
 H                  4.67789400   -3.07113400   -1.13417300
 H                  0.98363200    0.48954500   -2.32221900
 H                  2.70223200    0.53472000   -2.72335800
 H                  0.34201200    2.33663300   -0.35029900
 H                  3.58961800    2.67308900   -3.13940900
 H                  3.60399200    5.11982400   -2.83206100
 H                  1.96137400    6.20366800   -1.30108900
 H                  0.31723800    4.77743400   -0.07477700
 H                 -3.08069900   -2.36494100    3.40190700
 H                 -3.94703800   -3.71508400    2.66281300
 H                 -4.47057800   -2.05793400    2.35408000
 H                  1.87311500    0.33075500    3.27411600
 H                  3.19126900   -0.60570100    3.98484600
 H                  1.82195100   -1.42862700    3.22873600
 C                  2.03918600   -2.43649100   -3.20084200
 H                  1.38913200   -3.30372900   -3.36690700
 H                  1.72044100   -1.61112300   -3.84549800
 H                  3.06550200   -2.70011000   -3.47640400
83
2. 
 C                 -0.52537300   -2.17136500    0.52704800
 C                 -1.49060400   -1.77840000    1.51788300
 C                 -2.79721200   -1.92794000    0.95898800
 C                 -2.64489600   -2.34523800   -0.39137200
 C                 -1.25450400   -2.52532300   -0.65194900
 C                  0.95181200   -2.11525100    0.69796300
 C                 -1.17130000   -1.38730200    2.93498000
 H                 -1.99133100   -0.82701800    3.39508800
 H                 -0.99073700   -2.27439600    3.55893100
 H                 -0.27799600   -0.75859300    2.98886000
 C                 -4.10044500   -1.83276200    1.69875700
 H                 -4.42400400   -2.82982000    2.02893300
 H                 -4.02152400   -1.20637000    2.59217500
 H                 -4.90050700   -1.41992200    1.07589700
 C                 -3.75058700   -2.66734100   -1.35772900
 H                 -4.67968200   -2.14948200   -1.09950900
 H                 -3.48633900   -2.38665300   -2.38363100
 H                 -3.96980200   -3.74494900   -1.36561200
 C                 -0.70710800   -3.20267400   -1.87646500
 H                  0.37606300   -3.33533100   -1.81403300
 H                 -1.15024000   -4.20276200   -1.97763000
 H                 -0.92259600   -2.66266200   -2.80490600
 C                  2.95425500    0.42673500    1.88603700
 C                  3.59804700   -0.67563300    1.24141500
 C                  3.98554800   -0.25201600   -0.06256000
 C                  3.59604400    1.10918200   -0.22239800
 C                  2.95006800    1.52923500    0.98054900
 C                  2.44160100    0.45238100    3.30051200
 H                  1.58492100    1.12501000    3.40934700
 H                  2.12962300   -0.53993200    3.64159800
 H                  3.22048200    0.80235700    3.99258900
 C                  3.95651100   -1.99059700    1.87483600
 H                  4.99586800   -1.97657700    2.23102900
 H                  3.32382500   -2.21464900    2.73863000
 H                  3.86464200   -2.82777000    1.17486900
 C                  4.74304100   -1.07455800   -1.06771600
 H                  4.58328000   -2.14706500   -0.91632400
 H                  4.44860300   -0.83743700   -2.09551700
 H                  5.82453300   -0.89404700   -0.99070600
 C                  3.94787200    1.99346400   -1.38465700
 H                  3.98959100    1.43891700   -2.32682100
 H                  3.23191800    2.81017000   -1.51108800
 H                  4.93741400    2.44712100   -1.23125500
 C                  2.43821300    2.91380500    1.27316800
 H                  3.22454600    3.53429800    1.72554800
 H                  2.10306200    3.42315000    0.36441000
 H                  1.59171300    2.89552400    1.96566800
 C                 -1.21399500    0.11833100   -2.19233300
 C                  0.19567100    0.50203300   -2.74972100
 C                  1.36202900   -0.23386100   -2.02835000
 C                  0.41649500    2.02385700   -2.63460500
 H                 -0.35418000    2.57578900   -3.18732500
 H                  0.38891800    2.35439500   -1.59161800
 H                  1.39029800    2.30531100   -3.05423700
 C                  0.24123900    0.14355800   -4.25728000
 H                  1.19409200    0.44957900   -4.71023400
 H                  0.13054500   -0.93695600   -4.41015000
 H                 -0.56811100    0.64485000   -4.80518400
 C                 -3.28046400    1.04238400    0.36795700
 C                 -3.25106300    2.58610200    0.52762700
 C                 -2.70092400    3.28343500   -0.72917100
 H                 -1.65449100    3.01903300   -0.90802300
 H                 -3.27755000    3.00612200   -1.62146000
 H                 -2.75412500    4.37532800   -0.62639400
 C                 -2.39120600    2.97980400    1.74531600
 H                 -2.40560200    4.06676000    1.90047900
 H                 -2.77193200    2.50920400    2.66163400
 H                 -1.35096200    2.66575300    1.61087000
 C                 -4.69618500    3.08508500    0.76593300
 H                 -4.72349500    4.17517400    0.90122400
 H                 -5.34373300    2.83614000   -0.08426200
 H                 -5.12936700    2.62444100    1.66263400
 O                 -0.04165300    0.74977900    0.45762100
 Ti                -1.54908400   -0.11086400   -0.11793200
 Ti                 1.50979200   -0.12185600    0.08628600
 H                  1.47744100   -2.82557900    0.04820300
 H                  1.24295300   -2.32219400    1.73103900
 H                 -1.62470200   -0.72239200   -2.76355000
 H                 -1.91018000    0.96041900   -2.36698600
 H                  2.29920900   -0.01292500   -2.55442700
 H                  1.22234800   -1.32608900   -2.11982200
 H                 -3.75284300    0.62986300    1.26770500
 H                 -3.95768900    0.77370800   -0.46736700

89
TS2A2
 C                 -0.93540500   -2.64775900    0.23228300
 C                 -0.03998800   -2.00843200    1.14623400
 C                 -2.26517500   -2.44277900    0.69486500
 C                 -0.84135300   -1.39246300    2.16505400
 C                 -2.21567500   -1.67328600    1.89144400
 C                 -3.38239100   -1.35963300    2.78434500
 C                 -3.47242300   -3.10961100    0.09901200
 C                 -0.56845800   -3.58248200   -0.88584200
 C                  1.44290500   -1.93554300    1.06960600
 C                 -0.29738100   -0.68621400    3.37689600
 Ti                -1.25966200   -0.13437700    0.22089600
 O                  0.34159300    0.75942600    0.31513100
 C                  4.31602800   -0.39268100   -0.45264300
 C                  3.90586400    0.87733900   -0.94929300
 C                  4.08749300   -0.41604200    0.95267000
 C                  3.40096800    1.63997300    0.14798700
 C                  3.51577100    0.84111700    1.32490700
 C                  3.18518900    1.28264800    2.72530900
 C                  4.52792400   -1.50287300    1.89288100
 C                  4.94056100   -1.49213700   -1.26653300
 C                  4.13228400    1.38576600   -2.34429700
 C                  2.93292600    3.06907700    0.08921500
 Ti                 1.85999900   -0.15172400   -0.05598500
 C                  1.42683300   -0.73390600   -2.03899900
 C                 -1.13761800   -0.32830000   -1.91320400
 C                  0.17607400   -0.11151100   -2.72068100
 C                 -2.44835100    1.37611600    1.21766200
 C                 -2.48065100    2.87374300    0.80339700
 C                 -2.81449700    3.05235600   -0.69087300
 C                 -1.13152200    3.55618400    1.09970600
 C                 -3.57491400    3.59158300    1.62994600
 C                  0.01160200   -0.75748900   -4.12109500
 C                  0.40238300    1.39971900   -2.93632700
 H                 -3.51703100   -2.14191900    3.54483100
 H                 -3.25364200   -0.40915800    3.31081900
 H                 -4.31659800   -1.29070300    2.21727600
 H                 -3.46677700   -3.06463800   -0.99548100
 H                 -3.49828300   -4.17333300    0.37899500
 H                 -4.40535900   -2.65845200    0.44667900
 H                 -0.95794300   -3.26089000   -1.85893200
 H                  0.51524200   -3.68917100   -0.98357500
 H                 -0.97615900   -4.58422000   -0.69192800
 H                  1.88849100   -1.89057100    2.06678300
 H                  1.88142800   -2.78934700    0.53816400
 H                  0.43030200    0.08725400    3.10997100
 H                 -1.09331000   -0.20590200    3.95327600
 H                  0.20806500   -1.39666600    4.04689400
 H                  4.06022900    1.74076300    3.20797500
 H                  2.38125800    2.02488400    2.73737100
 H                  2.87042400    0.44516200    3.35638600
 H                  4.35599200   -2.50350400    1.48232000
 H                  5.60285800   -1.41740900    2.10452500
 H                  4.00625500   -1.44801000    2.85302300
 H                  4.49502800   -1.56239400   -2.26494400
 H                  6.01793800   -1.32228000   -1.40422200
 H                  4.82664700   -2.46784100   -0.78313300
 H                  5.14574600    1.80193200   -2.43682900
 H                  4.03981500    0.59359500   -3.09360400
 H                  3.42984800    2.17980700   -2.61138800
 H                  2.48047800    3.30890600   -0.87810500
 H                  2.18604300    3.28328900    0.85876300
 H                  3.77242200    3.76275400    0.23927800
 H                  2.27919400   -0.69295600   -2.72830900
 H                  1.24241400   -1.80690800   -1.85094900
 H                 -1.60858400   -1.27514600   -2.20991800
 H                 -1.85436900    0.45542700   -2.21417700
 H                 -3.47978700    1.00234600    1.27178100
 H                 -2.05568000    1.32308100    2.24666800
 H                 -2.03772100    2.61786900   -1.32927900
 H                 -3.76597600    2.56952900   -0.94494800
 H                 -2.90056100    4.11657000   -0.94923500
 H                 -0.89517000    3.49966000    2.17051700
 H                 -0.31724000    3.07266300    0.55419800
 H                 -1.16088200    4.61804700    0.82007000
 H                 -4.56565400    3.16357600    1.42884200
 H                 -3.38176000    3.49296900    2.70535800
 H                 -3.61727400    4.66421000    1.39290800
 H                  0.88980700   -0.56910800   -4.75428900
 H                 -0.11569400   -1.84426300   -4.04108900
 H                 -0.86899700   -0.35380000   -4.63945500
 H                  0.46596800    1.93134300   -1.98175100
 H                  1.32746500    1.58323400   -3.49710200
 H                 -0.42395600    1.83764700   -3.51195900
 C                 -4.02614700   -0.24351200   -0.97230500
 N                 -5.05117400   -0.07600000   -1.51609800
 C                 -6.28056000    0.15924700   -2.18969400
 H                 -6.26635200   -0.33028700   -3.16773600
 H                 -7.11002900   -0.24094600   -1.59952900
 H                 -6.42426300    1.23483300   -2.32799800

89
TS2B2
 C                 -3.27834300    1.87587500   -0.53830800
 N                 -3.85404000    2.82778700   -0.90629000
 C                 -4.53655000    3.98233200   -1.37913900
 H                 -5.52940500    3.70148900   -1.74197500
 H                 -4.64097200    4.70829400   -0.56788400
 H                 -3.96908100    4.43490700   -2.19728700
 C                  0.94028700    2.47935500    0.35411200
 C                  0.39384000    1.67435200    1.40184600
 C                  2.36427500    2.47719800    0.47006700
 C                  1.50379200    1.16692200    2.15694800
 C                  2.71440000    1.69637000    1.60366300
 C                  4.07598600    1.60523700    2.23152400
 C                  3.29400900    3.27782700   -0.39894600
 C                  0.16917900    3.36654800   -0.58042800
 C                 -1.03779400    1.30403400    1.59758800
 C                  1.40616600    0.31832900    3.39541300
 Ti                 1.64249900    0.11634600    0.07668800
 O                  0.19406100   -0.95455900    0.34716100
 C                 -3.83804600   -1.16992900    0.02562500
 C                 -2.94247700   -2.20792400   -0.35459800
 C                 -3.57719300   -0.83150500    1.38835300
 C                 -2.14143100   -2.53727600    0.78063000
 C                 -2.53969700   -1.69204100    1.85541100
 C                 -2.02916700   -1.78416900    3.26593800
 C                 -4.34178600    0.14987300    2.23261500
 C                 -4.95919400   -0.66522100   -0.83993000
 C                 -2.98447600   -2.94513500   -1.66318900
 C                 -1.12083900   -3.63582100    0.86689300
 Ti                -1.49042200   -0.29378900    0.15964300
 C                 -1.21018100    0.15828900   -1.93083600
 C                  1.32886400    0.47589300   -1.98161800
 C                  0.10674800   -0.20011500   -2.67326800
 C                  3.30212200   -1.20845200    0.38484500
 C                  4.52256200   -1.49054900   -0.53393200
 C                  5.19876000   -0.18512700   -0.99710400
 C                  4.09826900   -2.30647500   -1.77054100
 C                  5.56256900   -2.32562100    0.25046900
 C                  0.01527900    0.33753700   -4.12601000
 C                  0.30207000   -1.72574200   -2.76752100
 H                  4.17456900    2.34798600    3.03625800
 H                  4.26833300    0.62381100    2.67657100
 H                  4.87342800    1.80090300    1.50938800
 H                  2.99846900    3.23688700   -1.45381200
 H                  3.29431700    4.33799700   -0.10666300
 H                  4.32574800    2.92089800   -0.33188400
 H                  0.54129900    3.32334900   -1.61001700
 H                 -0.89193200    3.10980900   -0.59922600
 H                  0.24875700    4.41435400   -0.25566700
 H                 -1.20788000    0.93026000    2.61170600
 H                 -1.70327400    2.15749000    1.43956600
 H                  0.61365300   -0.43016500    3.31242900
 H                  2.34210100   -0.21350700    3.59521900
 H                  1.18586500    0.93422600    4.27940100
 H                 -2.62500000   -2.50388100    3.84575600
 H                 -0.99056500   -2.12749200    3.29800700
 H                 -2.08381600   -0.82568900    3.79138500
 H                 -5.15279700   -0.34741700    2.78353900
 H                 -3.69663900    0.63531800    2.97271300
 H                 -4.79375100    0.94105700    1.62689000
 H                 -4.61337700   -0.36970600   -1.83744700
 H                 -5.71469900   -1.45129000   -0.98055700
 H                 -5.46537700    0.19442900   -0.39313000
 H                 -3.77281300   -3.71192900   -1.64799200
 H                 -3.19845000   -2.27706100   -2.50362600
 H                 -2.04028800   -3.45135200   -1.87742700
 H                 -0.78887600   -3.95410200   -0.12530400
 H                 -0.23075000   -3.31407400    1.41608900
 H                 -1.53450200   -4.51747200    1.37619800
 H                 -2.07508600   -0.18089300   -2.52350000
 H                 -1.28335500    1.25855800   -1.91732000
 H                  1.35954500    1.53590000   -2.25774300
 H                  2.26444300    0.03898100   -2.38194500
 H                  3.67232300   -0.97373000    1.39341800
 H                  2.73674400   -2.15045100    0.50087600
 H                  4.50756700    0.43919300   -1.57547600
 H                  5.54869300    0.40318900   -0.14086600
 H                  6.07066100   -0.39518800   -1.63141300
 H                  3.63547000   -3.25548100   -1.47210000
 H                  3.37483100   -1.76570600   -2.38805500
 H                  4.96579500   -2.54085000   -2.40145900
 H                  5.92503000   -1.77694900    1.12885200
 H                  5.12305300   -3.26698500    0.60266300
 H                  6.43241100   -2.57291300   -0.37407900
 H                 -0.81373400   -0.13347100   -4.67232900
 H                 -0.15137400    1.42205700   -4.13459300
 H                  0.94072000    0.13635500   -4.68319600
 H                  0.41750500   -2.18118600   -1.78032600
 H                 -0.55780700   -2.19341500   -3.26276900
 H                  1.19234500   -1.96886400   -3.36181600

89
A2
 C                 -1.13619000   -2.59220400    0.41657000
 C                 -0.22860200   -1.89408200    1.27464500
 C                 -2.46521400   -2.29839900    0.84192100
 C                 -1.01844800   -1.15214700    2.21456000
 C                 -2.39454200   -1.40603100    1.95499500
 C                 -3.55349700   -0.95998400    2.80005600
 C                 -3.69491700   -3.00087900    0.33699100
 C                 -0.78384900   -3.66118700   -0.57855800
 C                  1.25474600   -1.86812700    1.22378900
 C                 -0.45983700   -0.33591600    3.34697400
 Ti                -1.37543100   -0.14955300    0.07501900
 O                  0.27504500    0.74475100    0.11198200
 C                  4.29240200   -0.53623100   -0.03820500
 C                  3.99446900    0.60433100   -0.83564900
 C                  3.89954500   -0.25658500    1.30230700
 C                  3.38968200    1.58730700    0.00675100
 C                  3.33586600    1.05710900    1.33070700
 C                  2.86620500    1.80034800    2.55254200
 C                  4.18114700   -1.12771200    2.49451000
 C                  4.95505800   -1.79717500   -0.52166000
 C                  4.40306500    0.80776000   -2.26676100
 C                  2.99475400    2.97967000   -0.40579300
 Ti                 1.80243600   -0.17319100   -0.00885800
 C                  1.52663500   -0.96937700   -1.94097300
 C                 -1.04776700   -0.59046500   -2.08838300
 C                  0.34033500   -0.42578800   -2.77795200
 C                 -2.44096300    1.57038600    0.99011800
 C                 -2.43082800    3.00336000    0.38708600
 C                 -2.90391800    3.02395000   -1.08082000
 C                 -1.02506400    3.62969400    0.46174000
 C                 -3.39342400    3.89163500    1.21256100
 C                  0.30499000   -1.19906900   -4.12370700
 C                  0.57047000    1.06324100   -3.11389900
 H                 -3.70718600   -1.64446100    3.64627900
 H                 -3.39878600    0.04172400    3.21163800
 H                 -4.48732900   -0.93556200    2.22858600
 H                 -3.66494800   -3.15203900   -0.74753400
 H                 -3.78512600   -3.99479500    0.79840900
 H                 -4.61052100   -2.45092800    0.57455800
 H                 -1.39002000   -3.60383300   -1.48901700
 H                  0.26472900   -3.61028200   -0.87995700
 H                 -0.94947300   -4.65643600   -0.14095100
 H                  1.67420300   -1.77117600    2.22810900
 H                  1.67867200   -2.76808600    0.76192800
 H                  0.23090500    0.43787800    2.99663500
 H                 -1.25244400    0.15950800    3.91472900
 H                  0.09388400   -0.97700000    4.04747300
 H                  3.66883700    2.43091300    2.96099500
 H                  2.01838000    2.45549700    2.32867900
 H                  2.55523200    1.11870700    3.35026700
 H                  4.05446500   -2.19179500    2.26911800
 H                  5.21543200   -0.98882200    2.83917600
 H                  3.52690700   -0.89050400    3.33927200
 H                  4.64468700   -2.05327200   -1.54073700
 H                  6.04973600   -1.69579100   -0.53268400
 H                  4.71710100   -2.65114200    0.12107400
 H                  5.40128500    1.26590200   -2.31705700
 H                  4.45401900   -0.13592100   -2.81840100
 H                  3.71476600    1.46802200   -2.80211300
 H                  2.63619700    3.01111100   -1.43938900
 H                  2.19835400    3.37919600    0.22841600
 H                  3.85013800    3.66681400   -0.33495700
 H                  2.42951300   -1.00473900   -2.56231100
 H                  1.31808000   -2.01528600   -1.65415800
 H                 -1.42735500   -1.60343800   -2.28477600
 H                 -1.73461700    0.07462200   -2.63667700
 H                 -3.47930900    1.30996900    1.23371800
 H                 -1.90646000    1.60451800    1.95319400
 H                 -2.24193100    2.43374300   -1.72503400
 H                 -3.92008900    2.61995800   -1.17672700
 H                 -2.92092500    4.05030400   -1.47130100
 H                 -0.67719500    3.67446400    1.50236700
 H                 -0.29873500    3.04167600   -0.10347000
 H                 -1.03419400    4.65507200    0.06802700
 H                 -4.42343400    3.51532700    1.15823000
 H                 -3.10081700    3.90889100    2.26968100
 H                 -3.39446400    4.92838900    0.84735900
 H                  1.23413100   -1.05349500   -4.69269300
 H                  0.18169600   -2.27619000   -3.95496100
 H                 -0.52967700   -0.86040200   -4.75294200
 H                  0.53366000    1.68310700   -2.21359800
 H                  1.54354700    1.21209100   -3.60008900
 H                 -0.19999900    1.42724800   -3.80695100
 C                 -3.36306300   -0.18152700   -0.85874200
 N                 -4.40977800   -0.17882400   -1.38178400
 C                 -5.65756600   -0.09569000   -2.05119400
 H                 -5.60801400   -0.63856600   -2.99977400
 H                 -6.44440400   -0.53167000   -1.42855400
 H                 -5.89723800    0.95379400   -2.24919000

89
B2
 C                 -2.82899900    1.42734200   -0.87292500
 N                 -3.44288800    2.27190800   -1.40109800
 C                 -4.13763500    3.31218500   -2.07236800
 H                 -3.74714600    3.41860700   -3.08875700
 H                 -5.20405900    3.07351700   -2.12047200
 H                 -4.00350800    4.25485700   -1.53361900
 C                  1.03781500    2.48581200   -0.28734500
 C                  0.44663400    2.00602100    0.92388300
 C                  2.46001500    2.46604900   -0.14326400
 C                  1.52469400    1.67654800    1.80745000
 C                  2.76331900    1.99061100    1.16044400
 C                  4.10892500    2.00317900    1.82939300
 C                  3.43670900    2.96393600   -1.17331700
 C                  0.30769800    3.10123400   -1.44600900
 C                 -1.00356000    1.75790300    1.18983800
 C                  1.38441900    1.19051000    3.22443200
 Ti                 1.62161900    0.11694400    0.04798500
 O                  0.10830700   -0.73572800    0.54264100
 C                 -4.02285100   -0.79276600    0.35772900
 C                 -3.25536300   -1.94408000    0.02206600
 C                 -3.56635000   -0.30135800    1.62329400
 C                 -2.34991500   -2.19287500    1.09803500
 C                 -2.54923500   -1.18322300    2.08471000
 C                 -1.84757000   -1.13134700    3.41175200
 C                 -4.16417800    0.84591000    2.38905800
 C                 -5.24134900   -0.32411300   -0.38938400
 C                 -3.51126400   -2.84559000   -1.15290700
 C                 -1.41690500   -3.36203200    1.23699400
 Ti                -1.58427900   -0.13186200    0.11785600
 C                 -1.19050100   -0.37033700   -2.05557000
 C                  1.34547500   -0.07726400   -2.03878100
 C                  0.16623700   -0.96102000   -2.53859600
 C                  3.19046300   -1.19259800    0.70320800
 C                  4.46791300   -1.68705300   -0.03049000
 C                  5.24377200   -0.52311900   -0.67723100
 C                  4.11008200   -2.71437800   -1.12213300
 C                  5.39901500   -2.38549700    0.98913700
 C                  0.17183500   -0.93864100   -4.09110800
 C                  0.33115900   -2.43141400   -2.11122800
 H                  4.18434400    2.85642200    2.51855200
 H                  4.29600400    1.09812400    2.41753100
 H                  4.92292500    2.09857300    1.10616600
 H                  3.17523000    2.62000900   -2.18108400
 H                  3.45910400    4.06271600   -1.20359800
 H                  4.45475800    2.62219000   -0.96668800
 H                  0.89389100    3.05725200   -2.36920600
 H                 -0.64881300    2.61151300   -1.63844200
 H                  0.10135400    4.16340100   -1.24572700
 H                 -1.16415300    1.54981800    2.25215900
 H                 -1.60695900    2.63605800    0.93785500
 H                  0.60400900    0.43117900    3.32180300
 H                  2.31771300    0.75273100    3.59276300
 H                  1.12376800    2.01782100    3.90049000
 H                 -2.34512600   -1.78902300    4.13882500
 H                 -0.80958100   -1.46594600    3.32543800
 H                 -1.84348800   -0.12356900    3.83776400
 H                 -5.01349500    0.51388700    3.00286900
 H                 -3.43647100    1.30681500    3.06404000
 H                 -4.53313100    1.63335000    1.72306100
 H                 -5.10866600   -0.38030500   -1.47510900
 H                 -6.10573600   -0.95475800   -0.13754100
 H                 -5.51020700    0.70518500   -0.13381300
 H                 -4.27805200   -3.59463500   -0.90799700
 H                 -3.86855800   -2.28825300   -2.02472800
 H                 -2.61114400   -3.38584800   -1.45742000
 H                 -1.26230800   -3.87180100    0.28225400
 H                 -0.43548500   -3.04514300    1.60333600
 H                 -1.82114800   -4.09989600    1.94418200
 H                 -2.01698700   -0.93474300   -2.51456100
 H                 -1.25203200    0.63332800   -2.50412000
 H                  1.33235900    0.87325000   -2.58478100
 H                  2.30743800   -0.56008400   -2.30096900
 H                  3.48542200   -0.77501000    1.67900800
 H                  2.57697400   -2.07793500    0.94891100
 H                  4.63233200   -0.00285400   -1.42403400
 H                  5.55315400    0.20988400    0.07554200
 H                  6.15051900   -0.88569000   -1.18033200
 H                  3.56118700   -3.56473100   -0.69837800
 H                  3.48614600   -2.27464400   -1.90630600
 H                  5.01730100   -3.10597600   -1.60132600
 H                  5.71434200   -1.68806100    1.77545600
 H                  4.88780400   -3.22607400    1.47455500
 H                  6.30427200   -2.77655100    0.50388700
 H                 -0.63734800   -1.55885500   -4.50118400
 H                  0.03743800    0.08206300   -4.47053700
 H                  1.12145500   -1.32142000   -4.49006200
 H                  0.36035000   -2.53782400   -1.02511800
 H                 -0.50338000   -3.03494500   -2.49324000
 H                  1.25465000   -2.85855200   -2.52183600

89
TSA2A31
 C                 -0.95938200   -2.73244500    0.29390700
 C                 -0.18014700   -1.97256800    1.23342300
 C                 -2.33793000   -2.53025300    0.58904000
 C                 -1.10150700   -1.30966700    2.10750000
 C                 -2.42629000   -1.65906900    1.71831400
 C                 -3.69564200   -1.30438900    2.44038200
 C                 -3.48477000   -3.22874000   -0.08452000
 C                 -0.43291100   -3.78217500   -0.64252500
 C                  1.29406700   -1.81435800    1.27930600
 C                 -0.70408400   -0.45280900    3.27862500
 Ti                -1.33037100   -0.37663200   -0.07352300
 O                  0.19211800    0.71862000    0.05785600
 C                  4.30178100   -0.25728500    0.08629100
 C                  3.93387100    0.89376200   -0.66620300
 C                  3.84654800   -0.07730600    1.42353100
 C                  3.23177200    1.78573200    0.20083100
 C                  3.17902800    1.18631600    1.49522500
 C                  2.61769700    1.81948700    2.74041500
 C                  4.15734400   -0.98086400    2.58412900
 C                  5.08196600   -1.43227500   -0.43633600
 C                  4.36046500    1.20163500   -2.07332900
 C                  2.74761100    3.16116900   -0.17295700
 Ti                 1.79333100   -0.08759200    0.04900500
 C                  1.72563500   -0.93002700   -1.88519500
 C                 -0.87496800   -0.87339700   -2.15282200
 C                  0.51677700   -0.57606400   -2.79122000
 C                  0.63342700   -1.40329500   -4.09856800
 C                  0.59879200    0.91452600   -3.18486400
 H                 -3.94903300   -2.07914200    3.17741100
 H                 -3.61517700   -0.35659100    2.98073500
 H                 -4.54312100   -1.22252300    1.75243800
 H                 -3.64761600   -4.22535800    0.35021100
 H                 -4.41750600   -2.66743300    0.01708000
 H                 -3.30240900   -3.36228600   -1.15538600
 H                 -1.10228500   -3.94831900   -1.49147700
 H                  0.55184400   -3.53302800   -1.04328500
 H                 -0.33829800   -4.73958800   -0.10993300
 H                  1.63806200   -1.65617500    2.30448900
 H                  1.82618300   -2.67939800    0.86615100
 H                 -0.06148700    0.38299800    2.98130300
 H                 -1.57656600   -0.03582700    3.79011200
 H                 -0.14649200   -1.04446700    4.01789800
 H                  3.39328000    2.38418900    3.27704900
 H                  1.80694300    2.51756200    2.51081400
 H                  2.22230200    1.07375400    3.43773300
 H                  4.10072000   -2.04043600    2.31308500
 H                  5.17332100   -0.79375500    2.95867500
 H                  3.47216600   -0.81948500    3.42212800
 H                  4.76752000   -1.71283000   -1.44797600
 H                  6.15684200   -1.20759300   -0.48234300
 H                  4.96275600   -2.31261100    0.20310800
 H                  5.30506700    1.76431400   -2.07060000
 H                  4.52863000    0.29376600   -2.66046800
 H                  3.62183400    1.80913400   -2.60456100
 H                  2.32851200    3.18530500   -1.18440600
 H                  1.97308400    3.52075200    0.50999100
 H                  3.57346000    3.88619300   -0.14463500
 H                  2.65266700   -0.82790800   -2.46101700
 H                  1.67535800   -1.99482400   -1.59430300
 H                 -1.14551800   -1.92079000   -2.33237200
 H                 -1.61713200   -0.29700100   -2.72456700
 H                  1.56688000   -1.17812400   -4.63348200
 H                  0.62126500   -2.47915000   -3.88480500
 H                 -0.20312100   -1.18733700   -4.77664200
 H                  0.48475200    1.56333300   -2.31094800
 H                  1.56215800    1.14338200   -3.65958500
 H                 -0.19093000    1.17052500   -3.90339400
 C                 -3.21647200    0.00694500   -0.74331400
 N                 -4.31217100    0.01707800   -1.27114600
 C                 -5.54157000    0.75840100   -1.16733300
 H                 -5.59742000    1.36254300   -0.25353300
 H                 -5.63653100    1.42101900   -2.03476600
 H                 -6.38559400    0.06192100   -1.19204400
 C                 -2.81256400    1.40007700    0.72844200
 C                 -2.62395300    2.86517500    0.22268200
 C                 -3.82240000    3.71991500    0.69406100
 C                 -2.51931400    2.96852900   -1.31391600
 C                 -1.34192100    3.46459400    0.83923600
 H                 -3.83116100    1.23701800    1.09106100
 H                 -2.17725900    1.22186800    1.60482000
 H                 -4.76749700    3.36767200    0.26281500
 H                 -3.92060600    3.69366600    1.78632800
 H                 -3.69588600    4.76806500    0.39399500
 H                 -1.67204800    2.38996600   -1.69547200
 H                 -3.42427800    2.60401600   -1.81149000
 H                 -2.37456300    4.01369700   -1.61610500
 H                 -1.40895500    3.48351000    1.93513300
 H                 -0.46601200    2.87367200    0.55997000
 H                 -1.19372700    4.49689300    0.49620700

89
TSA2A32
 C                  1.34028400   -0.68597000    2.61891900
 C                  0.27120600   -1.34548400    1.93625400
 C                  2.58188800   -1.21238300    2.14850700
 C                  0.87735300   -2.33464600    1.08315100
 C                  2.29585600   -2.26122600    1.23106600
 C                  3.30522200   -3.22610500    0.68055600
 C                  3.94089900   -0.84815700    2.67749200
 C                  1.21926600    0.26095300    3.78178600
 C                 -1.18178700   -0.99977300    1.95793600
 C                  0.13289000   -3.33843200    0.24779500
 Ti                 1.38954300   -0.25122800    0.16322600
 O                 -0.23048100   -0.11160900   -0.77085300
 C                 -4.15805700   -0.39311300    0.63982800
 C                 -4.10226500    0.75857100   -0.19551300
 C                 -3.63265200   -1.49738000   -0.09250200
 C                 -3.50197800    0.37408600   -1.43456200
 C                 -3.21830000   -1.02445500   -1.37324500
 C                 -2.68274300   -1.85821200   -2.50665300
 C                 -3.66937600   -2.93224300    0.35418400
 C                 -4.75679100   -0.45393400    2.01863400
 C                 -4.72038400    2.09192900    0.12066400
 C                 -3.28678900    1.25651900   -2.63430200
 Ti                -1.74683000    0.09826200    0.13826500
 C                 -1.51598300    2.17322700    0.55768800
 C                  0.96673000    2.00945200    1.09420000
 C                 -0.12686300    2.84226200    0.37277500
 C                  2.58511100   -1.01192100   -1.47886500
 C                  2.63214900   -0.45385900   -2.92914400
 C                  3.10647900    1.00966900   -2.98873700
 C                  1.25753100   -0.56977500   -3.61622900
 C                  3.64015600   -1.31241400   -3.73356000
 C                 -0.17735300    4.23587400    1.05538400
 C                  0.17198400    3.07143300   -1.12118900
 H                  3.44380900   -4.06778200    1.37370200
 H                  3.00314300   -3.64281100   -0.28414200
 H                  4.28228300   -2.75439800    0.53892900
 H                  4.20546400   -1.46600200    3.54785900
 H                  4.71962900   -0.99322500    1.92270300
 H                  3.98421600    0.19849500    2.99424500
 H                  1.89630000    1.11831800    3.70289500
 H                  0.20299200    0.64790200    3.89821700
 H                  1.47172400   -0.26606700    4.71239900
 H                 -1.80063800   -1.89821100    2.03903000
 H                 -1.43434400   -0.34845200    2.80508400
 H                 -0.66316200   -2.86921900   -0.33621200
 H                  0.79797900   -3.84918300   -0.45425300
 H                 -0.32877000   -4.10707800    0.88355900
 H                 -3.47589800   -2.08375500   -3.23323100
 H                 -1.87613800   -1.35018900   -3.04389700
 H                 -2.28605300   -2.81479400   -2.15390000
 H                 -3.62284800   -3.02450600    1.44377400
 H                 -4.60743100   -3.40629200    0.03252600
 H                 -2.85011500   -3.52278500   -0.06513500
 H                 -4.19885500   -1.12703100    2.67905800
 H                 -4.77530500    0.53296700    2.49207100
 H                 -5.79337200   -0.81821300    1.98708400
 H                 -5.81565700    2.02764100    0.06369700
 H                 -4.46616600    2.44602500    1.12591200
 H                 -4.40665400    2.86293000   -0.58848500
 H                 -3.07395200    2.29167500   -2.34939800
 H                 -2.44854700    0.90603400   -3.24439100
 H                 -4.17746900    1.26970000   -3.27839600
 H                 -2.26308300    2.78350600    0.03921300
 H                 -1.79473100    2.21002100    1.63014000
 H                  1.65210500    2.67178200    1.62972800
 H                  3.61607300   -1.10409900   -1.11044500
 H                  2.19342400   -2.04024200   -1.55360900
 H                  2.38684200    1.68437000   -2.51526600
 H                  4.06750300    1.13671200   -2.47743800
 H                  3.22981100    1.33260300   -4.03150400
 H                  0.91347800   -1.61270300   -3.62419900
 H                  0.49998700    0.02227600   -3.09555700
 H                  1.31289900   -0.22881500   -4.65875300
 H                  4.64833900   -1.23801700   -3.30683400
 H                  3.35101800   -2.37097300   -3.72671600
 H                  3.69337200   -0.98597500   -4.78161100
 H                 -0.97417200    4.85422200    0.62267400
 H                 -0.36973300    4.14368000    2.13140300
 H                  0.76937900    4.78014900    0.92729800
 H                  0.16818500    2.13151100   -1.67711900
 H                 -0.58069400    3.73486300   -1.56779400
 H                  1.15114300    3.54775100   -1.25731000
 C                  2.72307900    1.27476300    0.30315700
 N                  3.68448400    2.01806300    0.23105100
 C                  3.96195800    3.40651200    0.48893600
 H                  4.23668600    3.89075900   -0.45441300
 H                  3.10989000    3.94116800    0.92849000
 H                  4.82371800    3.48257400    1.16017500
 H                  0.49284400    1.43825500    1.88833500

89
TSB2B31
 C                 -2.34249700    1.50737200   -0.83502400
 N                 -2.88747000    2.38393800   -1.47282200
 C                  1.13309100    2.36634700   -0.78120500
 C                  0.44614600    2.15174000    0.45567000
 C                  2.53845300    2.32516500   -0.52434200
 C                  1.44265000    1.97243900    1.46855400
 C                  2.73207500    2.10446800    0.86675300
 C                  4.02872000    2.19531500    1.62202400
 C                  3.60847100    2.57471800   -1.55313000
 C                  0.53168500    2.75034900   -2.10413400
 C                 -1.02798500    2.06615500    0.71000600
 C                  1.18265100    1.77589100    2.93780700
 Ti                 1.56728100    0.08332900    0.05138500
 O                  0.03464300   -0.59886100    0.69914400
 C                 -4.07751800   -0.72657500    0.09780100
 C                 -3.33952300   -1.94230700    0.13457400
 C                 -3.76821900    0.01395700    1.28497400
 C                 -2.57019500   -1.95524400    1.34575000
 C                 -2.85099600   -0.75451100    2.05723100
 C                 -2.31461800   -0.40678000    3.41838600
 C                 -4.41370000    1.30431400    1.70846800
 C                 -5.08182600   -0.33881100   -0.94978100
 C                 -3.50440200   -3.10152700   -0.80717600
 C                 -1.70838700   -3.08268900    1.84121500
 Ti                -1.65471800   -0.22270800    0.02643700
 C                 -1.22413000   -0.88729100   -2.00591200
 C                  1.30522300   -0.49949200   -1.96247700
 C                  0.17100700   -1.50684100   -2.31120800
 C                  3.06703900   -1.13020500    0.98264500
 C                  4.37521200   -1.76533200    0.43728500
 C                  5.26540300   -0.73069300   -0.27792100
 C                  4.06138100   -2.90973800   -0.54559900
 C                  5.17616900   -2.36171800    1.61944900
 C                  0.24207400   -1.80318100   -3.83298500
 C                  0.35958100   -2.85077800   -1.58070900
 H                  4.07898100    3.14095100    2.17976400
 H                  4.15207700    1.38549800    2.34914900
 H                  4.89167300    2.16835700    0.95261600
 H                  3.64803600    3.63615100   -1.83517800
 H                  4.59872700    2.29909800   -1.18138300
 H                  3.43558000    2.00378600   -2.47297400
 H                 -0.34649200    2.15493500   -2.36242100
 H                  0.22674300    3.80674000   -2.09379500
 H                  1.25567700    2.63813800   -2.91642500
 H                 -1.22803200    1.72605700    1.72947900
 H                 -1.51069600    3.04336500    0.62871500
 H                  0.40040400    1.03291700    3.12172600
 H                  2.08299700    1.43819500    3.46018100
 H                  0.86303100    2.71491300    3.41176300
 H                 -2.91965200   -0.87906100    4.20512100
 H                 -1.28494200   -0.75431000    3.54755800
 H                 -2.33182200    0.67154600    3.60619800
 H                 -5.30467400    1.10799100    2.32108200
 H                 -3.74014700    1.92428600    2.30942400
 H                 -4.73568800    1.89865000    0.84865200
 H                 -5.13536700    0.74534900   -1.08188200
 H                 -4.83391800   -0.77247100   -1.92323000
 H                 -6.08629700   -0.69272100   -0.67730600
 H                 -4.28208600   -3.78355200   -0.43504500
 H                 -3.80703100   -2.77775800   -1.80696300
 H                 -2.58360800   -3.68155200   -0.91232700
 H                 -1.34588300   -3.70545100    1.01905200
 H                 -0.83256300   -2.70937900    2.37989800
 H                 -2.27271700   -3.73305600    2.52446100
 H                 -2.00652000   -1.57219500   -2.36000500
 H                 -1.32395200    0.00897400   -2.63514400
 H                  1.26547400    0.33459900   -2.67132900
 H                  2.29109900   -0.98117100   -2.12249600
 H                  3.30392600   -0.56390200    1.89843200
 H                  2.41153900   -1.95200400    1.32197600
 H                  4.74497200   -0.27885000   -1.13066400
 H                  5.56362200    0.07415700    0.40255100
 H                  6.18397000   -1.19890800   -0.65675600
 H                  3.42360500   -3.66979400   -0.07764300
 H                  3.54426700   -2.54614900   -1.43894700
 H                  4.98489300   -3.40367100   -0.87502800
 H                  5.45820900   -1.58125900    2.33736300
 H                  4.58199100   -3.11060400    2.15756100
 H                  6.09825500   -2.84899500    1.27312600
 H                 -0.53390700   -2.52020000   -4.13430700
 H                  0.09771000   -0.88738600   -4.41906300
 H                  1.21682400   -2.22875200   -4.10901300
 H                  0.34153200   -2.73026400   -0.49442400
 H                 -0.43680600   -3.55291900   -1.86116000
 H                  1.31368600   -3.31679300   -1.85450300
 C                 -2.92373100    3.82055800   -1.53740100
 H                 -2.32963100    4.29730400   -0.74743500
 H                 -2.54191800    4.14227700   -2.51179200
 H                 -3.96219500    4.15807300   -1.46023700

89
TSB2B32
 C                  2.04786100    1.01803700   -1.36713700
 N                  2.40972400    1.60591400   -2.35780000
 C                  2.60676900    2.93349100   -2.87161900
 H                  1.82706200    3.15186200   -3.60890200
 H                  2.57340200    3.69316300   -2.08256500
 H                  3.57231200    2.98040700   -3.38455000
 C                 -1.22827300   -0.73245000   -2.36674500
 C                 -0.48822700   -1.60872100   -1.51152100
 C                 -2.62301300   -0.93715900   -2.13343400
 C                 -1.44833800   -2.33729300   -0.73501600
 C                 -2.76286500   -1.94566500   -1.14398700
 C                 -4.02673800   -2.65043700   -0.73921400
 C                 -3.72081900   -0.28050000   -2.92527400
 C                 -0.67714800    0.07513700   -3.50628200
 C                  0.98538100   -1.70104900   -1.33294200
 C                 -1.13692700   -3.42981200    0.25126100
 Ti                -1.53832300   -0.13252300    0.01065400
 O                 -0.03909400   -0.32871800    1.01334400
 C                  4.09429900   -0.54978100    0.05966700
 C                  3.83398100    0.36746900    1.12487800
 C                  3.48973100   -1.79551100    0.39249600
 C                  3.04809400   -0.30626100    2.10482800
 C                  2.83411000   -1.64373800    1.65312300
 C                  2.13815600   -2.71929000    2.44121600
 C                  3.69846800   -3.07723000   -0.36284700
 C                  4.98732800   -0.31442400   -1.12594000
 C                  4.42948100    1.74143900    1.25485000
 C                  2.58130100    0.24406600    3.42605000
 Ti                 1.61654300   -0.22270800    0.19837200
 C                  1.34670600    2.13754600    0.31990600
 C                 -1.04900700    1.82004200   -0.69146500
 C                 -0.09408700    2.71701400    0.15125000
 C                 -3.08699800   -0.03952800    1.48716500
 C                 -4.44354900    0.69849900    1.63861500
 C                 -5.40845400    0.38978300    0.48080800
 C                 -4.23804100    2.22354500    1.70145300
 C                 -5.11220900    0.25280000    2.96160900
 C                 -0.01307900    4.09926900   -0.54337100
 C                 -0.65858400    2.96139300    1.56831200
 H                 -4.02967500   -3.67521700   -1.13616300
 H                 -4.14052000   -2.72669400    0.34791800
 H                 -4.91501000   -2.14841800   -1.12857500
 H                 -3.57600200    0.80331900   -3.00831800
 H                 -3.75451800   -0.67667600   -3.95025400
 H                 -4.70397200   -0.44750500   -2.47810900
 H                 -1.23137200    1.00783900   -3.66059300
 H                  0.37525700    0.32543300   -3.36197500
 H                 -0.75386200   -0.49867100   -4.44147500
 H                  1.24232800   -2.69049600   -0.94700700
 H                  1.52858800   -1.54757000   -2.26969800
 H                 -0.31402600   -3.15551800    0.91658600
 H                 -2.00347800   -3.66151800    0.87905800
 H                 -0.85124000   -4.35726900   -0.26614700
 H                  2.80911300   -3.13501200    3.20641500
 H                  1.25146800   -2.33454900    2.95468300
 H                  1.81881200   -3.54911000    1.80438800
 H                  4.70427200   -3.47396600   -0.16619000
 H                  2.98354200   -3.85015200   -0.06692000
 H                  3.60692100   -2.93929600   -1.44491800
 H                  5.05417700    0.74616500   -1.38350800
 H                  6.00792400   -0.66848800   -0.92190200
 H                  4.62747200   -0.84423200   -2.01378500
 H                  5.41149700    1.68748900    1.74512800
 H                  4.58094600    2.21567500    0.28008300
 H                  3.80496300    2.40992600    1.85438200
 H                  2.62717700    1.33690000    3.45159200
 H                  1.54878400   -0.04863600    3.64352700
 H                  3.21008700   -0.12635400    4.24767500
 H                  1.53753500    1.91484700    1.37560200
 H                  2.10560900    2.87756900    0.05008200
 H                 -0.70978600    1.84418300   -1.73064600
 H                 -2.05705400    2.28144800   -0.69989700
 H                 -3.24960800   -1.11791700    1.66637900
 H                 -2.44144900    0.28377800    2.32455700
 H                 -4.97804600    0.69376200   -0.47931100
 H                 -5.64077400   -0.67857900    0.42859200
 H                 -6.35681800    0.92846000    0.61061800
 H                 -3.57527400    2.50083500    2.52925800
 H                 -3.79697000    2.60639800    0.77452200
 H                 -5.19610000    2.73827100    1.85257900
 H                 -5.31005100   -0.82643900    2.95768300
 H                 -4.46598000    0.47002400    3.82106600
 H                 -6.06908600    0.76926700    3.12140400
 H                  0.64698400    4.78813500    0.00247200
 H                  0.35762800    4.01339900   -1.57081000
 H                 -1.00648700    4.56170400   -0.59582300
 H                 -0.73869500    2.02771300    2.13336100
 H                 -0.00383400    3.64014400    2.13061800
 H                 -1.65217600    3.41952300    1.52294400

89
A31
 C                 -0.71276200   -2.77927700    1.00601500
 C                 -0.10019600   -1.69005900    1.70362700
 C                 -2.13042000   -2.64146900    1.11350800
 C                 -1.15664800   -0.89475300    2.25698300
 C                 -2.40446200   -1.49104600    1.90724400
 C                 -3.76620800   -1.05480100    2.37289100
 C                 -3.14370700   -3.61465000    0.57563000
 C                 -0.00741700   -3.99398000    0.47542300
 C                  1.34903800   -1.35516700    1.77473800
 C                 -0.95512800    0.31701300    3.12188600
 Ti                -1.31501900   -0.68602500   -0.10615200
 O                  0.08049700    0.56691500   -0.17188900
 C                  4.24680200    0.20532700    0.17764300
 C                  3.73242200    1.10257000   -0.80218000
 C                  3.73546800    0.59414200    1.44832700
 C                  2.88678400    2.04364700   -0.14026700
 C                  2.89047500    1.73103800    1.25204000
 C                  2.21809700    2.53355600    2.33296400
 C                  4.13960500    0.00776200    2.77242100
 C                  5.21212300   -0.91864100   -0.08110100
 C                  4.13775700    1.15172700   -2.24799400
 C                  2.19491800    3.21674500   -0.78105200
 Ti                 1.74984200   -0.02205700    0.10900000
 C                  1.90959200   -1.34441600   -1.53207600
 C                 -0.62359200   -1.75434500   -1.90275700
 C                  0.74338400   -1.40350400   -2.55540000
 C                 -3.87437100    1.76866200   -0.28148600
 C                 -3.17585500    3.15769000   -0.33557900
 C                 -2.38733600    3.28940700   -1.65235700
 C                 -2.22052500    3.33297300    0.85840100
 C                 -4.27125000    4.23930400   -0.27959800
 C                  1.07755200   -2.49626200   -3.60596900
 C                  0.63518000   -0.06221100   -3.31153400
 H                 -4.08033000   -1.62749800    3.25696400
 H                 -3.78310200    0.00364800    2.64887900
 H                 -4.53099600   -1.20687100    1.60336900
 H                 -3.23859900   -4.49507400    1.22730000
 H                 -4.13736600   -3.16113000    0.50152600
 H                 -2.87009100   -3.97757000   -0.42132400
 H                 -0.58896900   -4.50255000   -0.29951800
 H                  0.97336200   -3.76252100    0.05257600
 H                  0.14985600   -4.71706300    1.28897400
 H                  1.59836100   -0.87765900    2.72631100
 H                  1.98855000   -2.23953800    1.66261200
 H                 -0.23206100    1.01090900    2.68401400
 H                 -1.88722000    0.86845400    3.27574900
 H                 -0.57636400    0.02953000    4.11329900
 H                  2.88011500    3.33341300    2.69477500
 H                  1.30076000    3.01095400    1.97428300
 H                  1.95421500    1.91830500    3.19897500
 H                  4.20966300   -1.08478000    2.74009900
 H                  5.12273800    0.38892500    3.08189200
 H                  3.43114400    0.26599400    3.56517900
 H                  4.97222000   -1.46080100   -1.00260400
 H                  6.24014800   -0.54376400   -0.18486100
 H                  5.21351800   -1.64456700    0.73822000
 H                  5.00479700    1.81477000   -2.38016100
 H                  4.42432200    0.16610800   -2.62666500
 H                  3.33624600    1.53199200   -2.88788600
 H                  1.95321400    3.02050700   -1.83029300
 H                  1.25760100    3.46117400   -0.27241200
 H                  2.83167200    4.11250700   -0.75321000
 H                  2.86343700   -1.28891900   -2.07068600
 H                  1.94605500   -2.29332600   -0.96446900
 H                 -0.64940300   -2.83308800   -1.70580800
 H                 -1.39638400   -1.58714300   -2.66753200
 H                 -4.65285400    1.73318800   -1.06027400
 H                 -4.39608000    1.68145500    0.68376400
 H                 -1.57774100    2.55278200   -1.70219300
 H                 -3.03941200    3.14398000   -2.52361100
 H                 -1.93946400    4.28723800   -1.73635600
 H                 -2.75775200    3.24660200    1.81195900
 H                 -1.42715200    2.58067300    0.84038100
 H                 -1.75540900    4.32658100    0.82987100
 H                 -4.96486300    4.15316300   -1.12565200
 H                 -4.85798200    4.16544100    0.64498600
 H                 -3.82792900    5.24178500   -0.31357500
 H                  2.00717400   -2.26405400   -4.14472600
 H                  1.20328100   -3.47548800   -3.12766200
 H                  0.27360600   -2.58774300   -4.34924400
 H                  0.36735700    0.75521400   -2.63561100
 H                  1.58361500    0.19201000   -3.80267600
 H                 -0.13300600   -0.12210700   -4.09441300
 C                 -2.95737700    0.58489200   -0.38008800
 N                 -3.09071600   -0.44841800   -1.11828000
 C                 -4.10303700   -0.82251900   -2.09148400
 H                 -4.68783500   -1.66143000   -1.69804900
 H                 -4.78045700    0.00494400   -2.33120200
 H                 -3.60670200   -1.16227100   -3.00576900

89
A32
 C                  1.41555400    0.38920000    2.56289600
 C                  0.54749200   -0.69730500    2.21586700
 C                  2.76250000   -0.01684500    2.31745600
 C                  1.37904300   -1.76761200    1.75051800
 C                  2.74388200   -1.35493600    1.83729300
 C                  3.95310800   -2.21888800    1.62501400
 C                  3.99477500    0.78840300    2.62313600
 C                  1.01725400    1.65349000    3.27374700
 C                 -0.94207400   -0.70074800    2.21037800
 C                  0.89954900   -3.12863000    1.33157300
 Ti                 1.57341700   -0.00341400    0.17487100
 O                 -0.07302300   -0.41195000   -0.65587000
 C                 -4.03539400   -0.54995700    0.61276500
 C                 -3.90060100    0.05776300   -0.66717000
 C                 -3.36116000   -1.80680700    0.57958600
 C                 -3.10513100   -0.80446300   -1.48306900
 C                 -2.78535800   -1.96372600   -0.71755100
 C                 -2.07940200   -3.18139800   -1.24934500
 C                 -3.41285200   -2.85481500    1.65567800
 C                 -4.81250900    0.00587400    1.77502800
 C                 -4.62579900    1.28609500   -1.13697900
 C                 -2.77165100   -0.60036000   -2.93616000
 Ti                -1.59667100   -0.10384300    0.22088800
 C                 -1.77121700    2.03498300    0.44477600
 C                  0.45586800    3.27763300    0.08859200
 C                 -1.01845000    3.11850100   -0.38015800
 C                  2.97356000   -0.96208200   -1.20096300
 C                  2.75343100   -0.99622700   -2.74027600
 C                  2.42906400    0.39130900   -3.32646400
 C                  1.60374400   -1.96106600   -3.09174600
 C                  4.04316300   -1.51507800   -3.41981400
 C                 -1.69807500    4.49073300   -0.16210800
 C                 -1.03622100    2.80196000   -1.88865800
 H                  4.33792600   -2.58236500    2.58834000
 H                  3.72610900   -3.09705700    1.01440100
 H                  4.76559100   -1.67718500    1.12990300
 H                  4.33493600    0.62115800    3.65541000
 H                  4.82547800    0.52288200    1.96092900
 H                  3.81463400    1.86336200    2.51518200
 H                  1.65292400    2.50230300    2.99808000
 H                 -0.01915800    1.93459600    3.07032200
 H                  1.11157400    1.52499500    4.36170200
 H                 -1.33109400   -1.67759600    2.50159400
 H                 -1.35842400    0.04428100    2.90044100
 H                 -0.10231700   -3.08044600    0.89908600
 H                  1.55701700   -3.58205500    0.58270600
 H                  0.85767800   -3.81458900    2.19018000
 H                 -2.75106700   -3.76578000   -1.89400100
 H                 -1.19990400   -2.91719500   -1.84415700
 H                 -1.74755300   -3.84500700   -0.44568300
 H                 -3.49619100   -2.41517900    2.65448800
 H                 -4.28723200   -3.50554900    1.51456300
 H                 -2.52795200   -3.49918600    1.65109800
 H                 -4.78950000    1.10100700    1.79313500
 H                 -5.86919200   -0.29409900    1.73079400
 H                 -4.41655700   -0.34680100    2.73305300
 H                 -5.60016400    1.01059800   -1.56507400
 H                 -4.82253900    1.98948200   -0.32191000
 H                 -4.07193700    1.82216200   -1.91283700
 H                 -2.72038100    0.46047300   -3.19895000
 H                 -1.80822600   -1.05018000   -3.19327900
 H                 -3.53418100   -1.06036000   -3.58096900
 H                 -2.83261200    2.30444000    0.46634400
 H                 -1.44088700    2.10234900    1.49718200
 H                  0.94233700    4.07511400   -0.49634800
 H                  3.95642000   -0.50848600   -0.99191900
 H                  3.05705400   -2.00925000   -0.87421000
 H                  1.49659200    0.79243600   -2.91536800
 H                  3.23087300    1.10940700   -3.11651300
 H                  2.31601900    0.33776900   -4.41784200
 H                  1.82587400   -2.97707900   -2.73888200
 H                  0.67051400   -1.63644300   -2.62252900
 H                  1.45009500   -2.01271300   -4.17824400
 H                  4.88821600   -0.84154200   -3.22665200
 H                  4.31479500   -2.50734500   -3.03872200
 H                  3.92012800   -1.59546900   -4.50932700
 H                 -2.73194700    4.47214400   -0.52624900
 H                 -1.72372000    4.75397200    0.90261100
 H                 -1.17064100    5.29315200   -0.69662500
 H                 -0.55392600    1.84222900   -2.09964800
 H                 -2.06641700    2.74914700   -2.25892400
 H                 -0.52159500    3.58268500   -2.46521100
 C                  1.25861700    2.02249600    0.06087500
 N                  2.47474400    1.81698300   -0.25906900
 C                  3.51896800    2.74274700   -0.67242200
 H                  4.12164700    2.28056500   -1.45756700
 H                  3.10730600    3.69092800   -1.03820300
 H                  4.17528100    2.94764200    0.18113000
 H                  0.44877100    3.62256500    1.13313500

89
B31
 C                  1.43272900   -2.00310400    0.09354300
 N                  2.22433300   -1.88345500   -0.89581500
 C                 -1.67142000   -2.41953000   -0.93059700
 C                 -0.96508300   -2.52022600    0.30328100
 C                 -3.00383000   -2.00304500   -0.64019500
 C                 -1.84255800   -2.12017400    1.35080600
 C                 -3.11845300   -1.83951500    0.77046200
 C                 -4.38385000   -1.65415600    1.56005400
 C                 -4.10865300   -1.88265400   -1.65563400
 C                 -1.16223200   -2.86211900   -2.27432200
 C                  0.44369200   -3.06542700    0.46723300
 C                 -1.53408200   -2.12088400    2.82396900
 Ti                -1.47205500   -0.10468200    0.03392600
 O                  0.13292100    0.37666600    0.62965200
 C                  4.23406000    0.33919700    0.21767000
 C                  3.63654700    1.63085800    0.11051200
 C                  3.76879800   -0.26833800    1.42396700
 C                  2.78762300    1.81273100    1.24556000
 C                  2.87351300    0.64364200    2.05518200
 C                  2.15314000    0.44544100    3.35984900
 C                  4.21885100   -1.59774300    1.96439300
 C                  5.25926800   -0.23225600   -0.72337500
 C                  3.97954700    2.67014200   -0.91896800
 C                  1.99501600    3.04275200    1.59173200
 Ti                 1.83919400   -0.00988800   -0.03658100
 C                  1.39717700    0.66159900   -2.06214000
 C                 -1.17246900    0.52449100   -1.96976500
 C                  0.05961300    1.40247000   -2.34866200
 C                 -2.68338000    1.34439200    1.05854700
 C                 -3.84799500    2.27442100    0.61796100
 C                 -4.96631500    1.51763400   -0.12227600
 C                 -3.33344600    3.39722700   -0.30167300
 C                 -4.45857100    2.93273300    1.87890200
 C                 -0.01771300    1.69049400   -3.87225600
 C                  0.03026600    2.76322300   -1.62931500
 H                 -4.64110800   -2.58608300    2.08286200
 H                 -4.30085000   -0.87143100    2.32226000
 H                 -5.22988300   -1.40057900    0.91764400
 H                 -4.46098700   -2.87299000   -1.97650400
 H                 -4.97076000   -1.34348900   -1.25512100
 H                 -3.78047800   -1.34980800   -2.55558800
 H                 -0.17610900   -2.44832000   -2.50618100
 H                 -1.08194400   -3.95795100   -2.31836100
 H                 -1.83878200   -2.55815000   -3.07790200
 H                  0.60483300   -3.34566900    1.51378200
 H                  0.56029600   -3.97961300   -0.13471900
 H                 -0.48142100   -1.89430000    3.01946300
 H                 -2.13086400   -1.37426400    3.35836700
 H                 -1.75685100   -3.09722700    3.27831400
 H                  2.67432400    0.95903700    4.18004500
 H                  1.13409700    0.84257400    3.31540900
 H                  2.08488400   -0.61286600    3.63148500
 H                  5.17911400   -1.50581400    2.49090600
 H                  3.49718600   -2.01170500    2.67561200
 H                  4.35643300   -2.33711200    1.16798700
 H                  5.04821100    0.02907500   -1.76586700
 H                  6.26492100    0.14628400   -0.49078400
 H                  5.30331500   -1.32386800   -0.65753200
 H                  4.81785900    3.29302700   -0.57526700
 H                  4.28071000    2.21819300   -1.86921300
 H                  3.13847600    3.33808100   -1.12564600
 H                  1.89630100    3.71589000    0.73604200
 H                  0.98524300    2.78570200    1.92939600
 H                  2.48079800    3.60643200    2.40055800
 H                  2.22587500    1.27139600   -2.45126200
 H                  1.39930500   -0.25547600   -2.67219500
 H                 -1.23136600   -0.31186700   -2.67625700
 H                 -2.10216300    1.10737600   -2.12654300
 H                 -3.00921700    0.76885900    1.94073400
 H                 -1.87162300    1.99075200    1.43085000
 H                 -4.58683300    1.04027200   -1.03297400
 H                 -5.41047600    0.74294000    0.51079300
 H                 -5.77156800    2.20414600   -0.41656600
 H                 -2.52706100    3.96590300    0.17694200
 H                 -2.94558500    2.99716100   -1.24288600
 H                 -4.14131600    4.09983100   -0.54545100
 H                 -4.87684200    2.17631100    2.55507500
 H                 -3.69816200    3.49408100    2.43556600
 H                 -5.26528800    3.63036400    1.61425900
 H                  0.81197500    2.33351600   -4.19645000
 H                  0.03441500    0.76009500   -4.45132900
 H                 -0.95673700    2.19711900   -4.13528400
 H                  0.01181900    2.64664300   -0.54319100
 H                  0.91690000    3.35397800   -1.89525300
 H                 -0.84855100    3.34861800   -1.92284400
 C                  2.59364800   -2.80903700   -1.95536300
 H                  3.66754000   -3.01329900   -1.89052900
 H                  2.04356700   -3.75526200   -1.89465600
 H                  2.40304500   -2.33653300   -2.92459300

89
B32
 C                  1.40018600    1.73173500   -0.75880400
 N                  2.15130900    1.11481300   -1.58778700
 C                  2.64068500    1.51191900   -2.89964500
 H                  2.00181000    2.27052400   -3.36576500
 H                  3.65180300    1.92101800   -2.79312700
 H                  2.70088000    0.63589600   -3.55059900
 C                 -1.01523500   -0.70371800   -2.42407200
 C                 -0.26278000   -1.59662400   -1.59634200
 C                 -2.40869400   -0.93935100   -2.20510200
 C                 -1.21654900   -2.36168200   -0.84567300
 C                 -2.53552500   -1.98926600   -1.25840700
 C                 -3.79010300   -2.74054000   -0.91370600
 C                 -3.51550000   -0.26455000   -2.96712700
 C                 -0.47591700    0.17462300   -3.51787800
 C                  1.21504600   -1.69521500   -1.43861600
 C                 -0.88106800   -3.47788100    0.10512100
 Ti                -1.42522300   -0.16559200   -0.02974500
 O                  0.11724200   -0.25513600    0.88492200
 C                  4.17997400   -0.41289800    0.24103900
 C                  3.76810000    0.62212100    1.13356700
 C                  3.58562500   -1.63612600    0.67151500
 C                  2.91415200    0.03637200    2.11571400
 C                  2.80182600   -1.35449400    1.83243000
 C                  2.02898700   -2.33821700    2.66593000
 C                  3.88091200   -2.99206500    0.09503800
 C                  5.16613300   -0.27608200   -0.88628800
 C                  4.23846600    2.05078500    1.09829500
 C                  2.26766100    0.73127600    3.28159400
 Ti                 1.77141600   -0.13769600    0.01220800
 C                  0.67529000    3.02704900   -0.90473300
 C                 -1.59940100    1.87953800   -0.66414900
 C                 -0.70585500    3.05817200   -0.18553200
 C                 -2.85491800   -0.46825600    1.54638400
 C                 -4.21934800    0.20556700    1.86747500
 C                 -5.14874700    0.27506900    0.64008400
 C                 -4.01023800    1.63398000    2.40791900
 C                 -4.93199200   -0.61400800    2.97006200
 C                 -1.37769200    4.39850300   -0.56483600
 C                 -0.49160000    3.03764400    1.33951900
 H                 -3.79431100   -3.71718000   -1.41805100
 H                 -3.88879500   -2.93367700    0.15991700
 H                 -4.68628700   -2.20514500   -1.23661200
 H                 -3.36291000    0.81921100   -3.03219100
 H                 -3.57605200   -0.64307800   -3.99792600
 H                 -4.49092400   -0.43014500   -2.50114300
 H                 -0.44038800    1.23820200   -3.25400400
 H                  0.53545800   -0.13413700   -3.79542500
 H                 -1.09943400    0.09114400   -4.41649500
 H                  1.49799900   -2.68803100   -1.08098600
 H                  1.74447900   -1.50412700   -2.37887000
 H                 -0.07880900   -3.19907500    0.79430900
 H                 -1.74794900   -3.76551800    0.70840900
 H                 -0.55097400   -4.37353900   -0.44100700
 H                  2.52053700   -2.50304400    3.63477100
 H                  1.01312700   -1.98109500    2.86689700
 H                  1.94938600   -3.31193800    2.17370800
 H                  4.82413600   -3.38779500    0.49763300
 H                  3.09788600   -3.71816800    0.33301000
 H                  3.97965500   -2.96065600   -0.99493600
 H                  5.24109500    0.75777900   -1.23657900
 H                  6.17263000   -0.58149300   -0.56618400
 H                  4.89866000   -0.90120500   -1.74544000
 H                  5.22229300    2.15365900    1.57723100
 H                  4.33808200    2.42474600    0.07320000
 H                  3.54885600    2.71700500    1.62551700
 H                  2.21033000    1.81355000    3.13224900
 H                  1.24902400    0.36652400    3.44650800
 H                  2.83766000    0.55756200    4.20516600
 H                  1.31225500    3.82181700   -0.48542900
 H                  0.54429900    3.27216500   -1.97162900
 H                 -1.75753100    1.98127400   -1.74628500
 H                 -2.60418400    2.01389200   -0.21667600
 H                 -2.99377900   -1.56066100    1.54087000
 H                 -2.18155500   -0.27684100    2.39965000
 H                 -4.69212400    0.84583900   -0.17707300
 H                 -5.38438900   -0.72550000    0.26364500
 H                 -6.09940300    0.76188600    0.89703500
 H                 -3.34869700    1.63217500    3.28328700
 H                 -3.56645000    2.29245000    1.65469000
 H                 -4.96693800    2.07927600    2.71122900
 H                 -5.13739400   -1.63642100    2.62905300
 H                 -4.31027700   -0.68169300    3.87132200
 H                 -5.88948400   -0.15593700    3.25470600
 H                 -0.75876000    5.25801800   -0.27052200
 H                 -1.55376300    4.46358100   -1.64584300
 H                 -2.34756000    4.49945600   -0.06375900
 H                  0.00164900    2.11774100    1.66101000
 H                  0.12068200    3.89228300    1.65887400
 H                 -1.45019400    3.10688400    1.86496600

95
TSA31A4
 C                  0.18837700    2.77852200    0.89792400
 C                 -0.00140100    1.61048200    1.70302600
 C                  1.57923700    3.11265800    0.89936800
 C                  1.28621000    1.23548100    2.20448400
 C                  2.25314700    2.17351600    1.72569100
 C                  3.70908400    2.22808800    2.09766300
 C                  2.19505700    4.31154300    0.23048600
 C                 -0.90752200    3.64126400    0.34279000
 C                 -1.26768900    0.84338000    1.87834200
 C                  1.54363200    0.09829900    3.15203500
 Ti                 1.35801100    0.91015800   -0.14686900
 O                  0.22621400   -0.56404300   -0.10085200
 C                 -3.67793600   -1.84199200   -0.03552800
 C                 -2.66485700   -2.45101100   -0.82524300
 C                 -3.23231100   -1.81498200    1.31894500
 C                 -1.59992700   -2.83626900    0.04322100
 C                 -1.95274700   -2.44685900    1.36715500
 C                 -1.17632800   -2.77282000    2.61259400
 C                 -4.01827500   -1.33824600    2.50874500
 C                 -5.03106900   -1.44256500   -0.55500400
 C                 -2.79105000   -2.79925900   -2.28143200
 C                 -0.38283600   -3.62022100   -0.35477300
 Ti                -1.55956500   -0.42443200    0.08433400
 C                 -1.79256300    0.52993400   -1.83469500
 C                  0.47499700    1.68624900   -2.00765400
 C                 -0.56462000    0.79713000   -2.74439800
 C                  4.46388600   -0.86321300   -0.08333000
 C                  4.19066100   -2.39161800   -0.00848300
 C                  3.52381200   -2.86212300   -1.31471800
 C                  3.28430400   -2.71856100    1.19089100
 C                  5.54348900   -3.10817800    0.16335000
 C                 -1.05763900    1.56990300   -3.99874700
 C                  0.08057300   -0.50853700   -3.24980200
 H                  3.88452100    2.97232800    2.88747300
 H                  4.06943100    1.26667000    2.47531700
 H                  4.34146000    2.50724200    1.24720900
 H                  2.08763400    5.21558200    0.84764200
 H                  3.26648500    4.16816900    0.05505700
 H                  1.72861500    4.52243100   -0.73815200
 H                 -0.55483200    4.28088400   -0.47185100
 H                 -1.74701900    3.05341600   -0.03607500
 H                 -1.29832600    4.30358800    1.12985900
 H                 -1.20433200    0.18473700    2.75072300
 H                 -2.12191600    1.50974600    2.03036800
 H                  1.23892400    0.36390300    4.17485100
 H                  0.98502100   -0.79696000    2.86757500
 H                  2.60310100   -0.17253200    3.18545500
 H                 -1.48073000   -3.75046700    3.01407200
 H                 -0.10072400   -2.82513800    2.41946100
 H                 -1.33793700   -2.03632200    3.40594900
 H                 -4.70602400   -0.52885700    2.24392300
 H                 -4.61903100   -2.15094400    2.94207100
 H                 -3.36379600   -0.96149900    3.30183700
 H                 -4.96229900   -0.82724900   -1.45969000
 H                 -5.61946000   -2.33404500   -0.81545800
 H                 -5.60461200   -0.88172600    0.18782500
 H                 -3.33446500   -3.74734800   -2.40744900
 H                 -3.34026600   -2.03444300   -2.84015000
 H                 -1.81424900   -2.91714300   -2.75791000
 H                 -0.07174100   -3.39186500   -1.37863700
 H                  0.46661100   -3.40255000    0.29656600
 H                 -0.57773400   -4.70132200   -0.30171500
 H                 -2.60181300    0.06287900   -2.41685200
 H                 -2.18266700    1.51928200   -1.54332500
 H                  0.00378600    2.65973100   -1.82372500
 H                  1.29955600    1.89141300   -2.70650100
 H                  5.23248200   -0.68161900   -0.85135300
 H                  4.90262700   -0.54540100    0.87456300
 H                  2.54954100   -2.38238900   -1.45754600
 H                  4.15013900   -2.62923200   -2.18583500
 H                  3.36496000   -3.94742200   -1.30057700
 H                  3.75720100   -2.42010500    2.13547400
 H                  2.32601300   -2.19820700    1.11163500
 H                  3.09089300   -3.79738600    1.24288400
 H                  6.21374000   -2.90722800   -0.68197600
 H                  6.05213900   -2.78466600    1.08040100
 H                  5.40182800   -4.19396000    0.22550500
 H                 -1.79048900    0.98115200   -4.56904900
 H                 -1.53592300    2.51565200   -3.71432800
 H                 -0.22297400    1.80795900   -4.67320700
 H                  0.43933400   -1.12445000   -2.42173700
 H                 -0.63609400   -1.10084400   -3.83430800
 H                  0.93313400   -0.28759600   -3.90744200
 C                  3.25926200    0.00857800   -0.30657400
 N                  3.14465400    0.94594700   -1.16787600
 C                  4.05234100    1.43894700   -2.19031000
 H                  3.49689500    1.56349900   -3.12468000
 H                  4.43090500    2.42373200   -1.89332200
 H                  4.90037600    0.76590600   -2.35940500
 C                 -3.84627600    1.25968800    0.23995300
 N                 -4.64930700    2.11306000    0.26089500
 C                 -5.60702200    3.16352100    0.26172900
 H                 -6.60270900    2.75676600    0.06267700
 H                 -5.60956700    3.66145400    1.23559000
 H                 -5.35460000    3.89174200   -0.51443500

95
A4
 C                  0.30201500    2.80609600    0.88700500
 C                  0.06818100    1.65973100    1.71051700
 C                  1.70517700    3.08566800    0.88043900
 C                  1.34183000    1.24132700    2.21408400
 C                  2.34438000    2.13221600    1.71600700
 C                  3.80441300    2.12774100    2.07602500
 C                  2.36572500    4.24367900    0.18213500
 C                 -0.75595400    3.69760300    0.30239300
 C                 -1.22591000    0.94247000    1.91222800
 C                  1.55973300    0.10704700    3.17610900
 Ti                 1.37748600    0.86810800   -0.12692700
 O                  0.14779400   -0.50186000   -0.06811200
 C                 -3.90497700   -1.52478400    0.17151200
 C                 -3.05240800   -2.17883600   -0.76056600
 C                 -3.28552900   -1.58125600    1.45998800
 C                 -1.91733100   -2.66998300   -0.04735100
 C                 -2.07014100   -2.31134600    1.32462500
 C                 -1.15976500   -2.73510900    2.44271900
 C                 -3.88579800   -1.08835400    2.74706200
 C                 -5.29821200   -1.04155100   -0.12522300
 C                 -3.39027100   -2.48724900   -2.19174900
 C                 -0.82612700   -3.52846700   -0.62111900
 Ti                -1.65764000   -0.29227100    0.05397800
 C                 -1.72606300    0.50509300   -2.03750500
 C                  0.55644500    1.66450800   -2.00182500
 C                 -0.38788200    0.72574600   -2.80131700
 C                  4.35708100   -1.10824900    0.02144100
 C                  3.99801900   -2.62168600    0.03625500
 C                  3.44470000   -3.03714700   -1.33995300
 C                  2.95828300   -2.91969300    1.13045700
 C                  5.28785900   -3.41240600    0.32728900
 C                 -0.73218000    1.42347500   -4.14744300
 C                  0.29403500   -0.60930300   -3.16096100
 H                  4.01758000    2.86145600    2.86642800
 H                  4.12911200    1.15139600    2.44723600
 H                  4.44014400    2.38266400    1.22057300
 H                  2.24681200    5.17781200    0.75021500
 H                  3.44118800    4.07760500    0.05994700
 H                  1.94466100    4.41301300   -0.81517700
 H                 -0.33093200    4.41961700   -0.40100700
 H                 -1.52944700    3.13781400   -0.22868700
 H                 -1.24985300    4.27153500    1.10085600
 H                 -1.12432600    0.20388500    2.71326300
 H                 -2.01994300    1.63550400    2.21079600
 H                  1.22052500    0.37864800    4.18635800
 H                  1.01053900   -0.78941500    2.87700400
 H                  2.61675100   -0.16637800    3.24885600
 H                 -1.44341100   -3.73027300    2.81506100
 H                 -0.11786700   -2.79525500    2.11571700
 H                 -1.20478600   -2.04900500    3.29372100
 H                 -4.52095600   -0.20981000    2.58945600
 H                 -4.50995600   -1.86169500    3.21726300
 H                 -3.11669500   -0.80599500    3.47255000
 H                 -5.36871200   -0.56258600   -1.10784000
 H                 -6.00366500   -1.88465300   -0.12612200
 H                 -5.65420400   -0.32687000    0.62291400
 H                 -3.92186000   -3.44716900   -2.26641800
 H                 -4.03642600   -1.72271500   -2.63464400
 H                 -2.49461600   -2.56150600   -2.81562200
 H                 -0.63369900   -3.28882900   -1.67114600
 H                  0.11412700   -3.39832900   -0.08015200
 H                 -1.09843100   -4.59283100   -0.56975900
 H                 -2.37774200   -0.14610000   -2.63659400
 H                 -2.22929300    1.48314100   -2.03948900
 H                  0.00972900    2.59859000   -1.82296400
 H                  1.40287700    1.94303700   -2.64800100
 H                  5.18219100   -0.95231100   -0.69165900
 H                  4.74980500   -0.84179100    1.01398400
 H                  2.52175600   -2.49816800   -1.57976700
 H                  4.17204300   -2.83466600   -2.13698500
 H                  3.22131800   -4.11095700   -1.36002100
 H                  3.34242200   -2.65278500    2.12324400
 H                  2.03817100   -2.35351700    0.96085300
 H                  2.71332500   -3.98931400    1.14517100
 H                  6.05285100   -3.22768000   -0.43745500
 H                  5.71185700   -3.13704700    1.30124500
 H                  5.08610500   -4.49033800    0.34370400
 H                 -1.42494300    0.81715200   -4.74850900
 H                 -1.20318600    2.39946800   -3.97479900
 H                  0.17265700    1.59168500   -4.74879300
 H                  0.52863100   -1.19298300   -2.26880500
 H                 -0.35583000   -1.21656800   -3.80743700
 H                  1.22721000   -0.43235400   -3.71419000
 C                  3.21449200   -0.16801000   -0.24881600
 N                  3.16698900    0.74199800   -1.14507400
 C                  4.11155200    1.13543000   -2.17746000
 H                  4.92297000    0.40991700   -2.30547100
 H                  3.57283600    1.24604200   -3.12335700
 H                  4.54097500    2.11113400   -1.92238000
 C                 -3.26702300    1.22951700    0.08037700
 N                 -4.08628400    2.06612500    0.09510700
 C                 -5.02274800    3.13180200    0.07513300
 H                 -4.51837600    4.06701100    0.33685700
 H                 -5.45856200    3.22590500   -0.92409800
 H                 -5.82094400    2.94113900    0.79856600

95
TSA4A51
 C                 -0.56487500   -2.49048900    1.62042200
 C                 -0.15127600   -1.20590600    2.10268700
 C                 -1.99141700   -2.54672500    1.65079800
 C                 -1.34141400   -0.48836200    2.45279500
 C                 -2.47226500   -1.31809000    2.18212500
 C                 -3.90856700   -1.01423800    2.50776400
 C                 -2.82386800   -3.74670200    1.29005100
 C                  0.32940600   -3.66868700    1.36399300
 C                  1.21939400   -0.62681200    2.13658500
 C                 -1.36383700    0.88057100    3.07297500
 Ti                -1.34848200   -0.74477600    0.10793300
 O                 -0.12819400    0.62944600   -0.11281800
 C                  3.68359900    1.53280400   -0.64675100
 C                  2.59934400    2.44790800   -0.51171900
 C                  4.02308000    1.05365500    0.65608700
 C                  2.27398200    2.54243400    0.87494200
 C                  3.16172700    1.68580200    1.59689900
 C                  3.31906000    1.61462800    3.08933500
 C                  5.18482500    0.16572200    1.00281400
 C                  4.44599800    1.23420400   -1.90723200
 C                  1.95971300    3.25915800   -1.60675200
 C                  1.26585600    3.49083600    1.46374000
 Ti                 1.65033400    0.35804700    0.17682300
 C                  1.69366200   -0.50425800   -2.05569000
 C                 -0.31414500   -2.00752100   -1.36569500
 C                  0.43105900   -1.29272600   -2.52779100
 C                 -4.28995400    1.13924100   -0.60217600
 C                 -3.90112200    2.62930800   -0.81973400
 C                 -3.13674600    2.77871800   -2.14831000
 C                 -3.02681800    3.14198000    0.33809600
 C                 -5.20272900    3.45113400   -0.88415000
 C                  0.86161000   -2.36498700   -3.56071900
 C                 -0.49939200   -0.30719700   -3.26992900
 H                 -4.20008800   -1.47471100    3.46259000
 H                 -4.08792100    0.06094500    2.59873500
 H                 -4.59311700   -1.40046000    1.74399600
 H                 -2.87515300   -4.46370900    2.12252100
 H                 -3.85351300   -3.46558700    1.04488500
 H                 -2.41178300   -4.28256000    0.42797200
 H                 -0.03878000   -4.30187700    0.54945900
 H                  1.34896200   -3.36267700    1.12013000
 H                  0.38143000   -4.29797000    2.26469300
 H                  1.26344200    0.14962700    2.90403900
 H                  1.98357000   -1.37549100    2.36563900
 H                 -0.96769100    0.84821000    4.09818900
 H                 -0.75395500    1.59071200    2.50711700
 H                 -2.37774600    1.28775200    3.12796000
 H                  4.14930300    2.25659200    3.41617000
 H                  2.42190000    1.95580600    3.61406400
 H                  3.53609800    0.59838800    3.43336500
 H                  5.43759700   -0.51497700    0.18497100
 H                  6.08161700    0.76227400    1.22417600
 H                  4.97378000   -0.44784500    1.88430200
 H                  3.82664400    1.34707100   -2.80169800
 H                  5.29865000    1.91966000   -2.01313600
 H                  4.84741900    0.21562400   -1.90904600
 H                  2.37000400    4.27880500   -1.62843200
 H                  2.13184200    2.82174600   -2.59491900
 H                  0.87710500    3.34408300   -1.46773800
 H                  0.36935900    3.56895200    0.84100500
 H                  0.94795900    3.17942700    2.46285700
 H                  1.69095600    4.50066600    1.55762500
 H                  1.58528600    0.56286900   -2.27741100
 H                  2.58862000   -0.81571900   -2.60186400
 H                  0.41164400   -2.66355900   -0.87757700
 H                 -1.07641200   -2.67732400   -1.79466400
 H                 -4.99062900    0.83975500   -1.39804100
 H                 -4.84807300    1.06663800    0.34383200
 H                 -2.19167400    2.22577200   -2.12428700
 H                 -3.72863900    2.40481900   -2.99388200
 H                 -2.90445400    3.83267000   -2.34538400
 H                 -3.54659500    3.04575800    1.30008000
 H                 -2.08856200    2.58351200    0.40030200
 H                 -2.78952400    4.20393100    0.19471500
 H                 -5.85078500    3.11336600   -1.70291100
 H                 -5.77159900    3.36935500    0.05070000
 H                 -4.98317500    4.51283800   -1.04962300
 H                  1.42361400   -1.92358300   -4.39651500
 H                  1.48681100   -3.13855400   -3.10122700
 H                 -0.01767600   -2.86986700   -3.98101600
 H                 -0.78338500    0.52736200   -2.62345300
 H                 -0.00484500    0.10623300   -4.15941200
 H                 -1.41662200   -0.80950000   -3.60438800
 C                 -3.14899700    0.16853800   -0.48551000
 N                 -3.03785300   -0.96835500   -1.05905300
 C                 -3.91099000   -1.66990600   -1.98596000
 H                 -4.66514900   -1.01155400   -2.43229400
 H                 -3.30366900   -2.11369200   -2.78007600
 H                 -4.41843800   -2.48526900   -1.45748100
 C                  2.62464900   -1.36600500   -0.32833800
 N                  3.30152100   -2.35971700   -0.45765000
 C                  3.78733400   -3.25076100   -1.47619800
 H                  4.83849300   -3.48372800   -1.28002800
 H                  3.22345200   -4.18852600   -1.42947700
 H                  3.68788200   -2.82711900   -2.48199400

95
TSA4A52
 C                  0.68919000    2.92525700    0.69973500
 C                  0.08039200    1.90883900    1.51071000
 C                  2.10331300    2.83676100    0.86465900
 C                  1.13491600    1.21941600    2.18873900
 C                  2.38073100    1.78717500    1.78533500
 C                  3.73808900    1.44534600    2.33727800
 C                  3.11112900    3.76655500    0.24615500
 C                 -0.00460200    4.03976400   -0.02845400
 C                 -1.36089100    1.54925600    1.62214400
 C                  0.94140300    0.12654900    3.20184500
 Ti                 1.32585800    0.73820200   -0.13890500
 O                  0.10827800   -0.62897100    0.09663300
 C                 -3.67118600   -1.75491800   -0.55361400
 C                 -2.56491600   -2.58447800   -0.20742500
 C                 -4.01922500   -0.98858300    0.59747500
 C                 -2.23755800   -2.34359000    1.16323100
 C                 -3.13928100   -1.36199000    1.66163400
 C                 -3.27371500   -0.92482500    3.09495200
 C                 -5.22600600   -0.10028700    0.71891200
 C                 -4.43906800   -1.76847900   -1.84435200
 C                 -1.90007100   -3.61898500   -1.07354900
 C                 -1.18952400   -3.09456500    1.93714900
 Ti                -1.68875200   -0.36386600   -0.07008300
 C                 -1.63536300   -0.22783200   -2.22633400
 C                  0.27691100    1.48376500   -1.91985200
 C                 -0.36432000    0.42405300   -2.85797400
 C                  4.23945900   -1.30974300   -0.34771000
 C                  3.86553900   -2.72053300    0.18075500
 C                  2.79250200   -3.34884800   -0.72791300
 C                  3.33275100   -2.63505600    1.62173800
 C                  5.13674200   -3.59038200    0.15578100
 C                 -0.78112000    1.12962200   -4.17430800
 C                  0.63540000   -0.68963600   -3.23127100
 H                  3.98285200    2.08239700    3.19937100
 H                  3.79540700    0.40591600    2.67271200
 H                  4.52905500    1.59513900    1.59442600
 H                  3.22753300    4.68350300    0.84211600
 H                  4.10042000    3.30268500    0.17542400
 H                  2.81677000    4.07394900   -0.76314500
 H                  0.51661600    4.31426300   -0.95135000
 H                 -1.02754900    3.77758200   -0.29993000
 H                 -0.04619100    4.93852100    0.60411600
 H                 -1.51711300    0.78923600    2.38627400
 H                 -1.97800100    2.40410200    1.90591900
 H                  0.42235700    0.50879400    4.09213500
 H                  0.34756800   -0.69993700    2.79955700
 H                  1.89758300   -0.28653100    3.53541000
 H                 -3.98795000   -1.56830400    3.62776100
 H                 -2.32450800   -0.98289600    3.63689300
 H                 -3.64087700    0.10293200    3.18009600
 H                 -5.41310000    0.46022400   -0.20173300
 H                 -6.12546700   -0.69452200    0.93497500
 H                 -5.11595800    0.62688000    1.52967700
 H                 -4.81605800   -0.77357800   -2.10251600
 H                 -3.82819200   -2.11332000   -2.68251800
 H                 -5.30583400   -2.44058300   -1.77027300
 H                 -2.24464200   -4.62743300   -0.80338900
 H                 -2.12416100   -3.46994800   -2.13306000
 H                 -0.81098600   -3.60515700   -0.95927100
 H                 -0.23197700   -3.11321800    1.40688400
 H                 -1.01433700   -2.64723400    2.91970900
 H                 -1.49988100   -4.13561500    2.10435500
 H                 -1.73298700   -1.25097400   -2.61437800
 H                 -2.53370200    0.30871000   -2.55696500
 H                 -0.51811600    2.18230700   -1.64257200
 H                  1.01421500    2.08102700   -2.48173600
 H                  4.74871300   -1.41632900   -1.31929400
 H                  4.98217000   -0.86591700    0.33469100
 H                  1.87036200   -2.75800300   -0.70599600
 H                  3.13658200   -3.40950900   -1.76853400
 H                  2.55345900   -4.36730600   -0.39687200
 H                  4.08284200   -2.20184900    2.29672900
 H                  2.42980900   -2.01998300    1.67125400
 H                  3.08583500   -3.63489200    2.00025500
 H                  5.53535800   -3.68730000   -0.86199000
 H                  5.92647300   -3.16237400    0.78664600
 H                  4.92390700   -4.60002100    0.52734500
 H                 -1.28036100    0.43043200   -4.85974300
 H                 -1.47544600    1.95416400   -3.97058600
 H                  0.09106400    1.54783700   -4.69715000
 H                  0.89670300   -1.30020900   -2.36205700
 H                  0.20466600   -1.35636300   -3.99046800
 H                  1.56138000   -0.27244600   -3.64746100
 C                  3.11629700   -0.31730900   -0.45504500
 N                  3.01548400    0.62688100   -1.31178000
 C                  3.88883900    1.02450900   -2.40482300
 H                  4.54950000    1.83200900   -2.06769600
 H                  4.50548600    0.19303100   -2.76597500
 H                  3.27894300    1.40682700   -3.22741200
 C                 -2.60081400    1.47941800   -0.10829100
 N                 -3.32067100    2.43082300   -0.33708500
 C                 -3.68478400    3.69333000    0.24731200
 H                 -3.49305200    4.49435600   -0.47398800
 H                 -4.75973900    3.68859900    0.45687300
 H                 -3.14065300    3.91133200    1.17543700

95
A51
 C                 -0.51566200   -2.44109100    1.73274800
 C                 -0.00428300   -1.17758500    2.17316300
 C                 -1.94224400   -2.42230900    1.83559200
 C                 -1.13779300   -0.38219500    2.54053200
 C                 -2.32461100   -1.15952500    2.35796100
 C                 -3.72015400   -0.77069700    2.76116000
 C                 -2.85833100   -3.57884700    1.54026600
 C                  0.29810200   -3.67143300    1.46117700
 C                  1.40985800   -0.70360300    2.16306700
 C                 -1.06618200    1.00185300    3.11904700
 Ti                -1.29569000   -0.71568900    0.19240300
 O                  0.03967100    0.49640500   -0.13929700
 C                  3.56877200    1.40406500   -0.98775500
 C                  2.50600000    2.31144700   -0.68656500
 C                  4.15271000    0.99023400    0.24522600
 C                  2.43449700    2.45236500    0.72700300
 C                  3.44838900    1.62590500    1.30680500
 C                  3.82825900    1.56677700    2.75962000
 C                  5.35987500    0.10874000    0.40667400
 C                  4.07135800    1.05805500   -2.36316700
 C                  1.65609100    3.03736900   -1.69210300
 C                  1.53772700    3.40330400    1.46976900
 Ti                 1.82660700    0.16644300    0.16133700
 C                  1.45786900   -1.91889100   -2.56462500
 C                 -0.77300100   -2.25873500   -1.35409600
 C                 -0.10140400   -1.87881400   -2.71026500
 C                 -4.00503900    1.58682300   -0.07746400
 C                 -3.54141100    2.92977200   -0.71827400
 C                 -3.24647100    2.72417800   -2.21594300
 C                 -2.28341500    3.45926000   -0.00752800
 C                 -4.68724500    3.94733500   -0.55969300
 C                 -0.46075700   -2.93189100   -3.78457700
 C                 -0.53645400   -0.49590700   -3.23368500
 H                 -3.98559900   -1.22322400    3.72715100
 H                 -3.82645000    0.31194300    2.87357900
 H                 -4.47029400   -1.10319700    2.03466900
 H                 -2.86704700   -4.30678500    2.36456400
 H                 -3.89108400   -3.24453900    1.39570100
 H                 -2.55727200   -4.11812000    0.63502300
 H                 -0.26152500   -4.41324600    0.88349400
 H                  1.21548800   -3.44738400    0.91689300
 H                  0.58771600   -4.14765800    2.40963300
 H                  1.55896900    0.06011400    2.93183800
 H                  2.11531500   -1.51905000    2.35778300
 H                 -0.75811300    0.97110600    4.17457900
 H                 -0.34396600    1.62235200    2.58355500
 H                 -2.03336900    1.51230000    3.07568100
 H                  4.62996700    2.28518600    2.98344600
 H                  2.98592800    1.80903300    3.41463300
 H                  4.19086900    0.57416300    3.04670400
 H                  5.26687500   -0.56033400    1.26935900
 H                  5.52901700   -0.51089700   -0.47931400
 H                  6.26904800    0.70816500    0.55875800
 H                  3.28677800    1.16314100   -3.11871200
 H                  4.89847000    1.71919200   -2.65920300
 H                  4.44574500    0.02983700   -2.41795900
 H                  2.14255800    3.96644300   -2.02237500
 H                  1.47275200    2.42971500   -2.58429400
 H                  0.68141500    3.30338900   -1.27489200
 H                  0.54578300    3.47371800    1.01428000
 H                  1.40400300    3.10508700    2.51376900
 H                  1.96660800    4.41597500    1.47710300
 H                  1.91257800   -1.43303500   -3.44044100
 H                  1.79263300   -2.96833100   -2.57488800
 H                 -0.16823300   -3.06135400   -0.91494000
 H                 -1.74250500   -2.72898600   -1.57703300
 H                 -4.96244900    1.29632900   -0.53804000
 H                 -4.20914400    1.77349500    0.98530400
 H                 -2.42412500    2.01690100   -2.36904200
 H                 -4.12861500    2.34176800   -2.74606200
 H                 -2.96300000    3.67326300   -2.68700600
 H                 -2.47634700    3.62998400    1.05929200
 H                 -1.45538900    2.74945400   -0.09096400
 H                 -1.97155700    4.41568000   -0.44640400
 H                 -5.60078800    3.60498100   -1.06194800
 H                 -4.92673600    4.11509700    0.49779200
 H                 -4.40879900    4.91422900   -0.99620800
 H                  0.06736300   -2.74815100   -4.73176000
 H                 -0.20802100   -3.94431800   -3.44600200
 H                 -1.53723400   -2.91231900   -3.99596100
 H                 -0.22533400    0.30279600   -2.55562400
 H                 -0.11153300   -0.29806000   -4.22811300
 H                 -1.62810100   -0.44968300   -3.32957700
 C                 -3.00378200    0.46657700   -0.15008700
 N                 -3.10060900   -0.61521900   -0.82029200
 C                 -4.14530100   -1.12068500   -1.69631200
 H                 -4.92698400   -0.37808300   -1.89213900
 H                 -3.69693000   -1.42811900   -2.64589900
 H                 -4.59830300   -2.00877600   -1.24161300
 C                  1.94011500   -1.22538700   -1.33695200
 N                  2.68332100   -1.64815500   -0.38932200
 C                  3.42262700   -2.89527200   -0.24616000
 H                  2.99278900   -3.70424900   -0.84825200
 H                  4.45914100   -2.73454400   -0.56331800
 H                  3.43827500   -3.19376600    0.80544600

95
A52
 C                 -1.49803400   -2.99729600    0.64321400
 C                 -0.68857000   -2.29252900    1.58683800
 C                 -2.81161600   -2.45485200    0.71333300
 C                 -1.49300700   -1.30117400    2.21461100
 C                 -2.81384000   -1.41025700    1.68356000
 C                 -4.02939200   -0.68012500    2.18554400
 C                 -4.00850100   -2.97923300   -0.03087000
 C                 -1.11260600   -4.22135400   -0.13816100
 C                  0.77141900   -2.56392900    1.90229600
 C                 -1.04583900   -0.37863300    3.31440400
 Ti                -1.34333000   -0.61589500   -0.11958400
 O                  0.07970700    0.50292200    0.09218900
 C                  3.96643300    1.28387000   -0.48332000
 C                  2.92865100    2.22980200   -0.20770600
 C                  4.18707700    0.52266500    0.69853200
 C                  2.51078400    2.04743200    1.14030000
 C                  3.28222600    0.98174900    1.70048600
 C                  3.25589700    0.53351600    3.13683900
 C                  5.23550900   -0.53806300    0.88681600
 C                  4.77998700    1.21189000   -1.74432300
 C                  2.42783500    3.28599000   -1.15373400
 C                  1.49930500    2.88369200    1.87252300
 Ti                 1.86701000    0.06008700   -0.03708200
 C                  1.81670000   -0.25197900   -2.18203500
 C                 -0.40628800   -1.56666600   -1.86002500
 C                  0.45794000   -0.69125200   -2.81621800
 C                 -3.73160800    2.00690300   -0.41066100
 C                 -3.07383100    3.31198000    0.11340500
 C                 -1.89983500    3.70150100   -0.80393500
 C                 -2.56400300    3.12481800    1.55337400
 C                 -4.13991700    4.42375900    0.08835600
 C                  0.76165400   -1.52767500   -4.08778200
 C                 -0.30068300    0.56998000   -3.27807100
 H                 -4.51688600   -1.24403300    2.99401700
 H                 -3.77867700    0.30752400    2.58375800
 H                 -4.77744500   -0.53962600    1.39806400
 H                 -4.46054100   -3.83370000    0.49363100
 H                 -4.78897500   -2.21818100   -0.13318300
 H                 -3.74466700   -3.32191500   -1.03730200
 H                 -1.50230100   -4.19415900   -1.16099000
 H                 -0.02789600   -4.33767100   -0.21164200
 H                 -1.50849800   -5.12762900    0.34153000
 H                  0.96418600   -2.32117300    2.95406700
 H                  1.00193300   -3.63060800    1.77170500
 H                 -0.01456600   -0.04683800    3.16230400
 H                 -1.67257800    0.51643600    3.37150900
 H                 -1.09731100   -0.87523200    4.29444500
 H                  3.95872400    1.11987800    3.74648200
 H                  2.26411200    0.65515100    3.58407600
 H                  3.53891500   -0.51924300    3.24243000
 H                  4.89807800   -1.32724900    1.56741000
 H                  5.50648300   -1.01265400   -0.06176400
 H                  6.15648900   -0.11528000    1.31311800
 H                  4.18774200    1.46148700   -2.62954200
 H                  5.62256500    1.91709300   -1.70554500
 H                  5.19925200    0.21307500   -1.90316200
 H                  3.04933900    4.19145600   -1.09752500
 H                  2.44607300    2.94373200   -2.19322900
 H                  1.39987800    3.58131200   -0.92267300
 H                  0.72021200    3.25450500    1.20122000
 H                  0.99954900    2.31752900    2.66458500
 H                  1.97642100    3.75556100    2.34317100
 H                  2.13805600    0.67314700   -2.68028200
 H                  2.59081800   -0.99703800   -2.41757300
 H                  0.23078800   -2.38608300   -1.50154800
 H                 -1.21100100   -2.04991900   -2.43812700
 H                 -4.19765100    2.21154800   -1.38816700
 H                 -4.55644100    1.73467100    0.26671100
 H                 -1.12235500    2.93002000   -0.78907800
 H                 -2.23200300    3.83414800   -1.84176400
 H                 -1.45022300    4.64720600   -0.47609100
 H                 -3.38347500    2.85217500    2.23147300
 H                 -1.79953000    2.34413200    1.60103700
 H                 -2.12244200    4.05690000    1.92763500
 H                 -4.52464300    4.58695700   -0.92643500
 H                 -4.99175600    4.17567400    0.73466300
 H                 -3.71949800    5.37316600    0.44125500
 H                  1.40604300   -0.97303300   -4.78395600
 H                  1.27599000   -2.46225900   -3.82885700
 H                 -0.16082200   -1.79498800   -4.62315700
 H                 -0.47688200    1.25840700   -2.44726900
 H                  0.27847900    1.10740400   -4.04113700
 H                 -1.26979800    0.31439400   -3.72416600
 C                 -2.84171000    0.79943600   -0.50019500
 N                 -2.88318700   -0.11279800   -1.39208300
 C                 -3.74810200   -0.27030000   -2.55254200
 H                 -4.66854600   -0.78734600   -2.25713800
 H                 -4.01599300    0.69597200   -2.99570000
 H                 -3.23779800   -0.88007900   -3.30115900
 C                  1.61991700   -1.67587900    1.03748400
 N                  2.42216800   -1.95713800    0.08926500
 C                  2.90193200   -3.23140200   -0.42024200
 H                  2.49251200   -4.08507400    0.13345000
 H                  2.62711800   -3.31830500   -1.47617200
 H                  3.99464600   -3.25571100   -0.35313000
